# Supplementary material
Source: PubMed Central journal article supplement (PMC10111369)
Supplement: mmc1.pdf [file mmc1.pdf]

**Biophysical Journal, Volume 122**

**Supplemental information**

**Activation mechanism of the human Smoothed receptor**

**Prateek D. Bansal, Soumajit Dutta, and Diwakar Shukla**

# Activation mechanism of the human Smoothed receptor

Prateek D. Bansal<sup>1</sup>, Soumajit Dutta<sup>1</sup>, and Diwakar Shukla<sup>1,2,3,4\*</sup>

<sup>1</sup>Department of Chemical and Biomolecular Engineering, University of Illinois at Urbana-Champaign, Urbana, IL, 61801, United States

<sup>2</sup>Department of Bioengineering, University of Illinois at Urbana-Champaign, Urbana, IL, 61801, United States

<sup>3</sup>Center for Biophysics and Quantitative Biology, University of Illinois at Urbana-Champaign, Urbana, IL, 61801, United States

<sup>4</sup>Cancer Center at Illinois, University of Illinois at Urbana-Champaign, Urbana, IL, 61801, United States

\*Correspondence: diwakar@illinois.edu

## **SUPPLEMENTARY FIGURES**

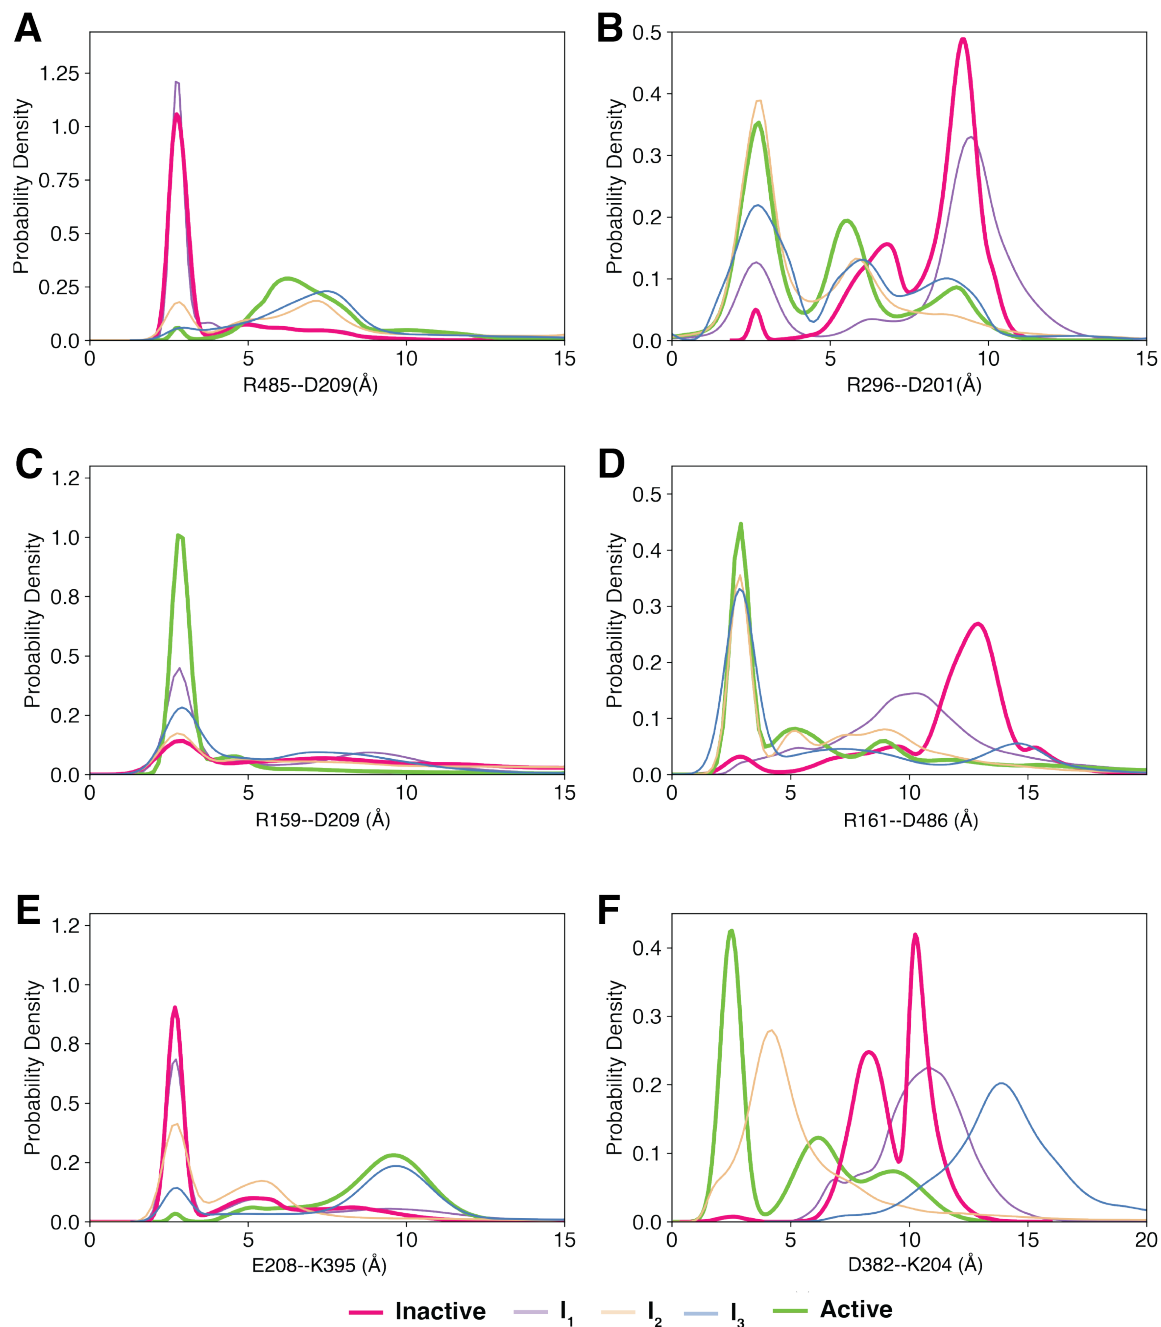

Figure S1: Figure 3 reconstructed using CHARMM36m force field. Use of CHARMM36m force field made noted no significant difference to the overall observations made using CHARMM36 force field.

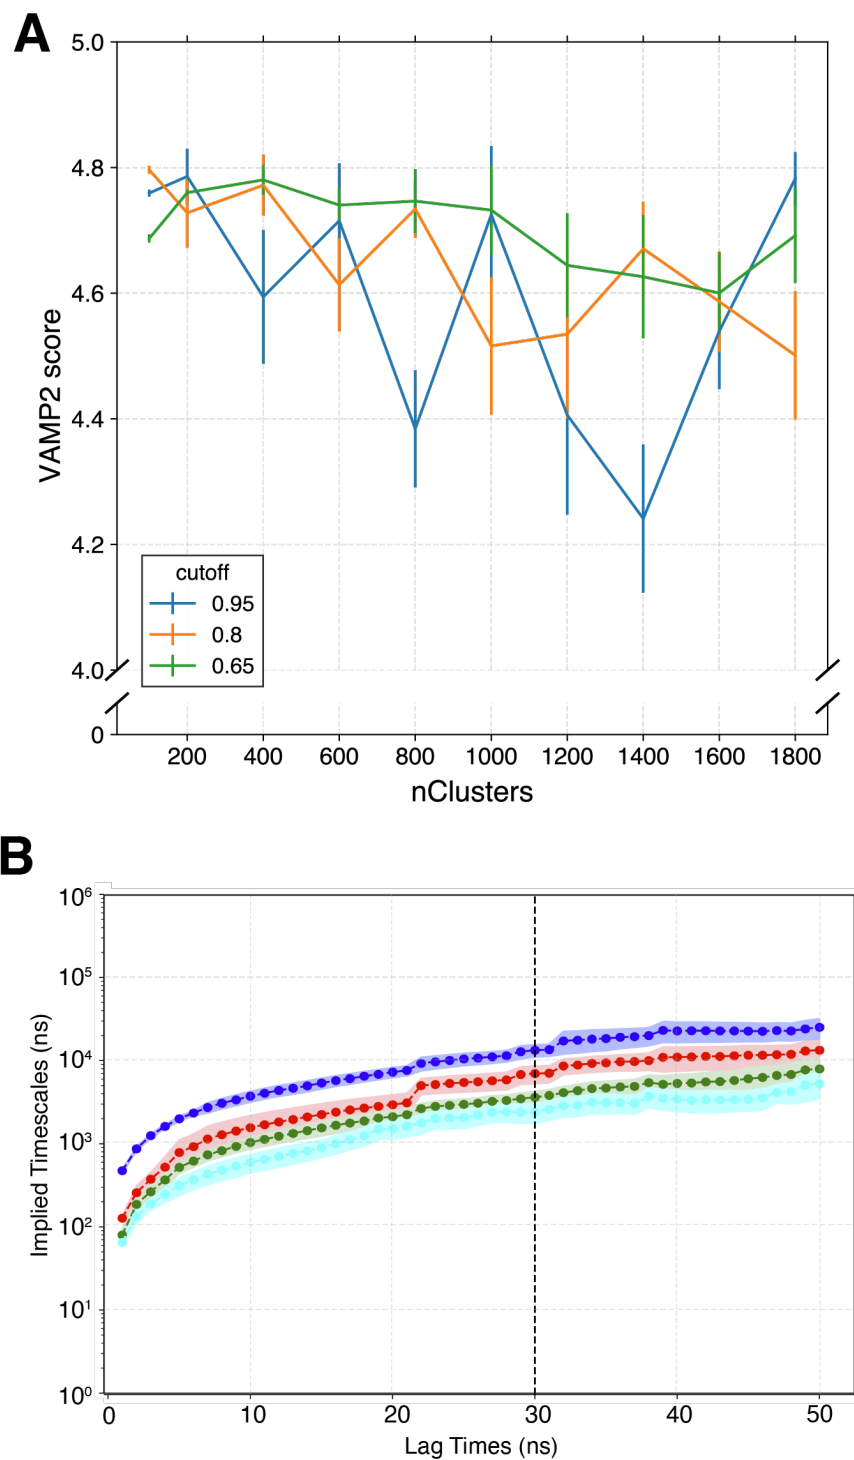

Figure S2: MSM construction for Apo-SMO. (A) VAMP2 score v/s nClusters used to cluster the data, as a function of varying variational cutoffs for choosing the number of tICA (time Independent Component Analysis) components. For final MSM construction, 200 clusters with a 0.95 variational cutoff (corresponding to 42 tICA components) was chosen to construct the MSM. (B) Implied Timescales v/s MSM lag time for the MSM with 200 clusters and 42 tICA components. A lagtime of 30 ns was chosen for construction of the final MSM.

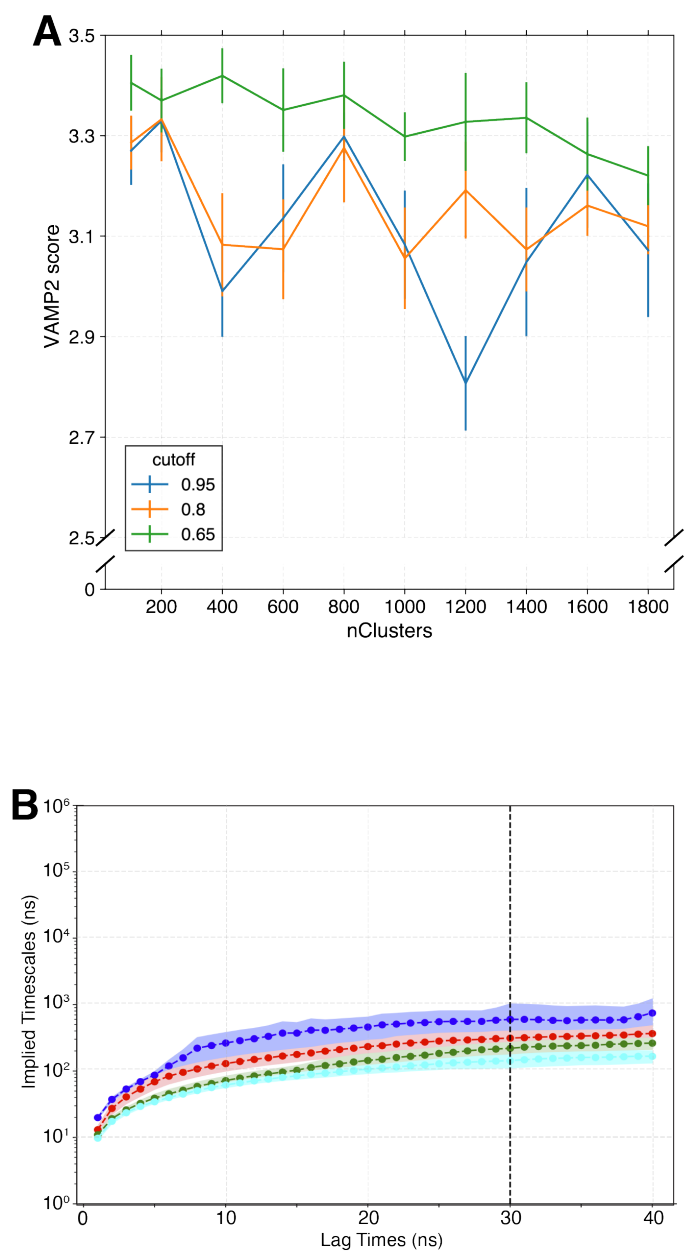

Figure S3: MSM construction for SANT1-SMO. (A) VAMP2 score v/s nClusters used to cluster the data, as a function of varying variational cutoffs for choosing the number of tICA (time Independent Component Analysis) components. For final MSM construction, 100 clusters with a 0.95 variational cutoff (corresponding to 34 tICA components) was chosen to construct the MSM. (B) Implied Timescales v/s MSM lag time for the MSM with 100 clusters and 34 tICA components. A lagtime of 30 ns was chosen for construction of the final MSM.

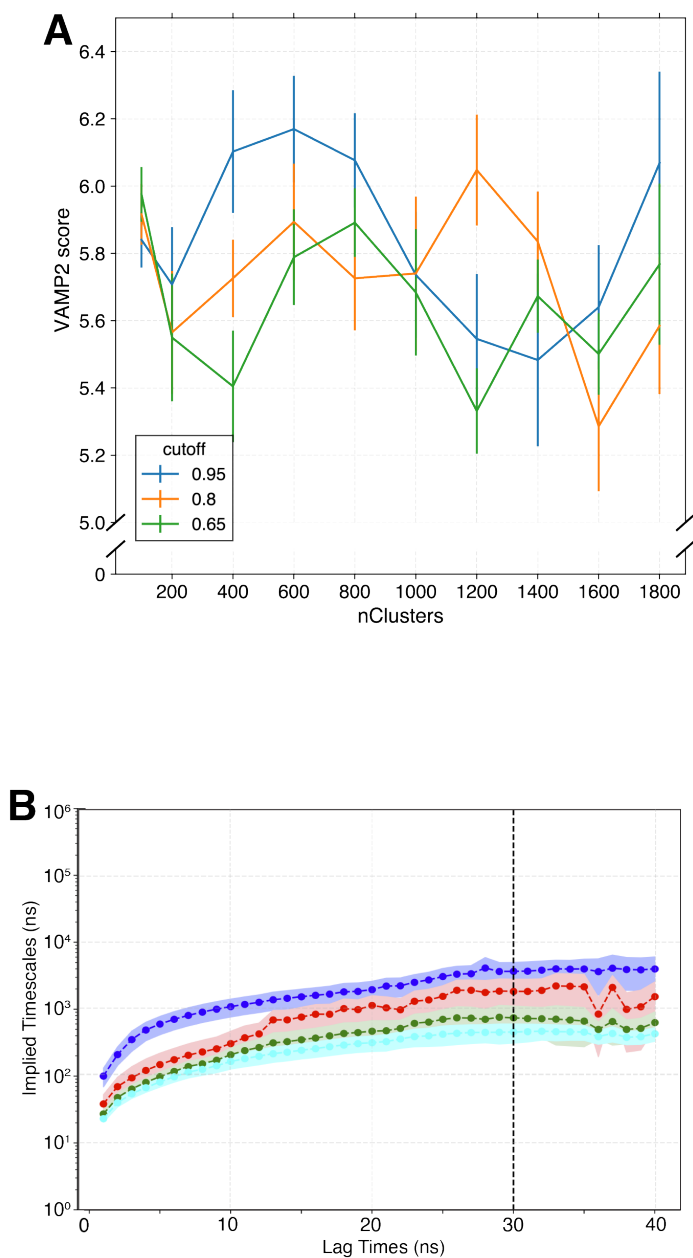

Figure S4: MSM construction for SAG-SMO. (A) VAMP2 score v/s nClusters used to cluster the data, as a function of varying variational cutoffs for choosing the number of tICA (time Independent Component Analysis) components. For final MSM construction, 100 clusters with a 0.95 variational cutoff (corresponding to 34 tICA components) was chosen to construct the MSM. (B) Implied Timescales v/s MSM lag time for the MSM with 100 clusters and 34 tICA components. A lagtime of 30 ns was chosen for construction of the final MSM.

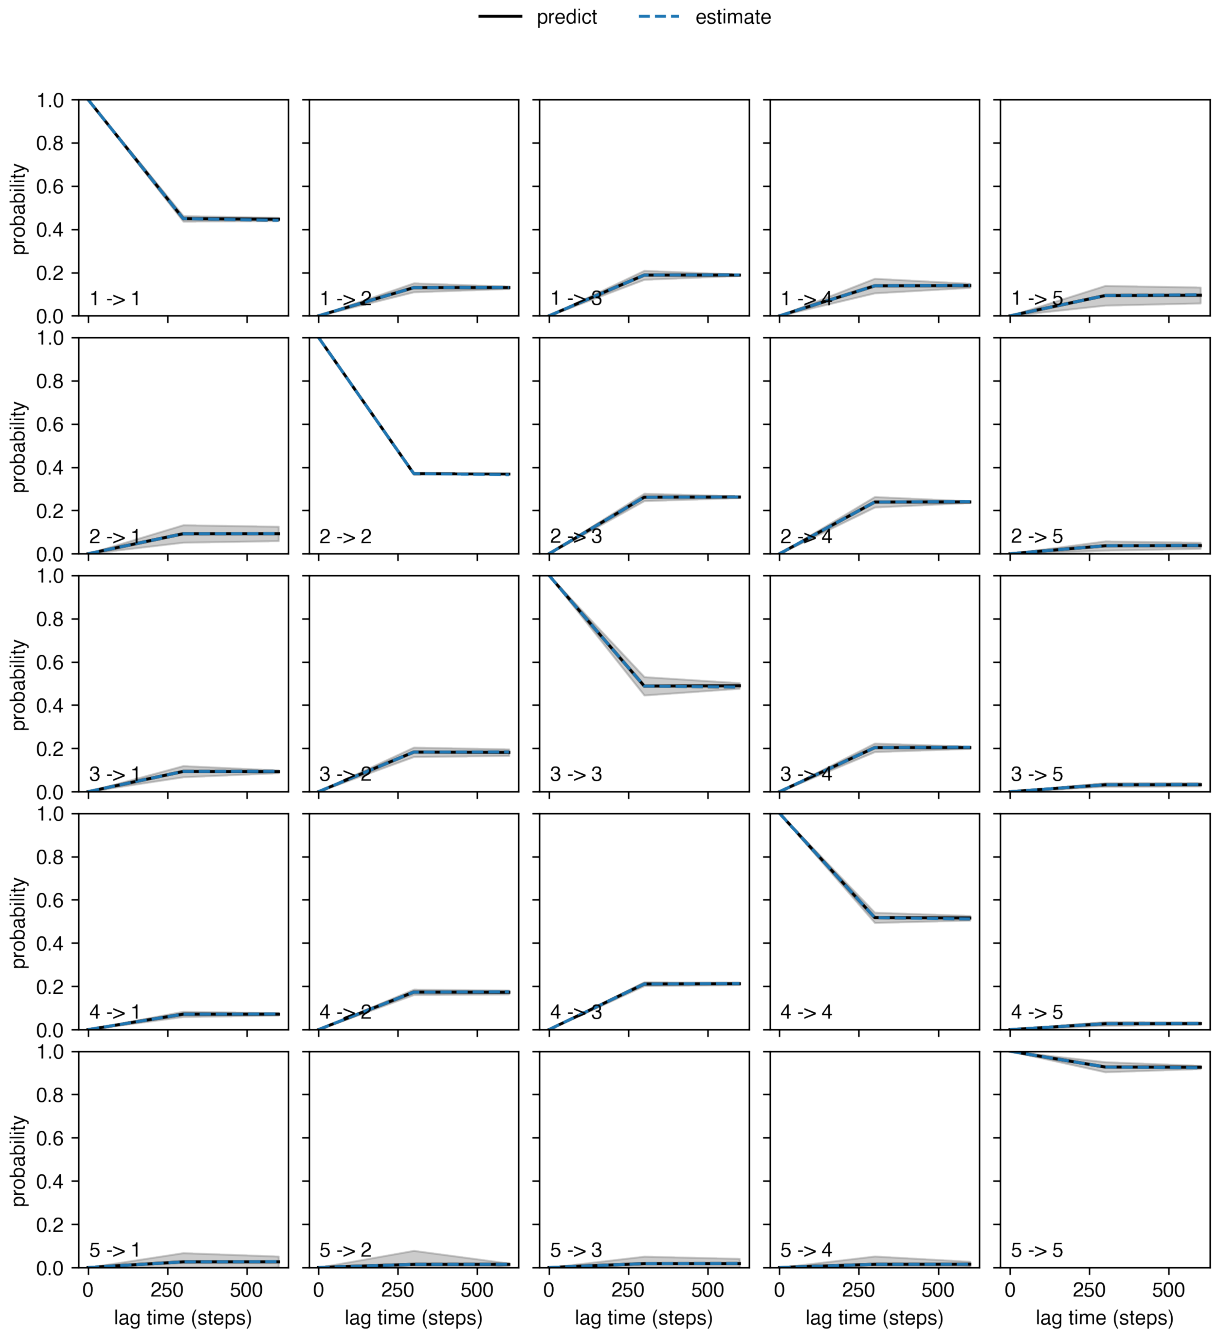

Figure S5: MSM validation for Apo-SMO. Chapman-Kolmogorov test performed for 5 macrostates for Apo-SMO. Chapman-Kolmogorov test was implemented using the pyEMMA package.(1)



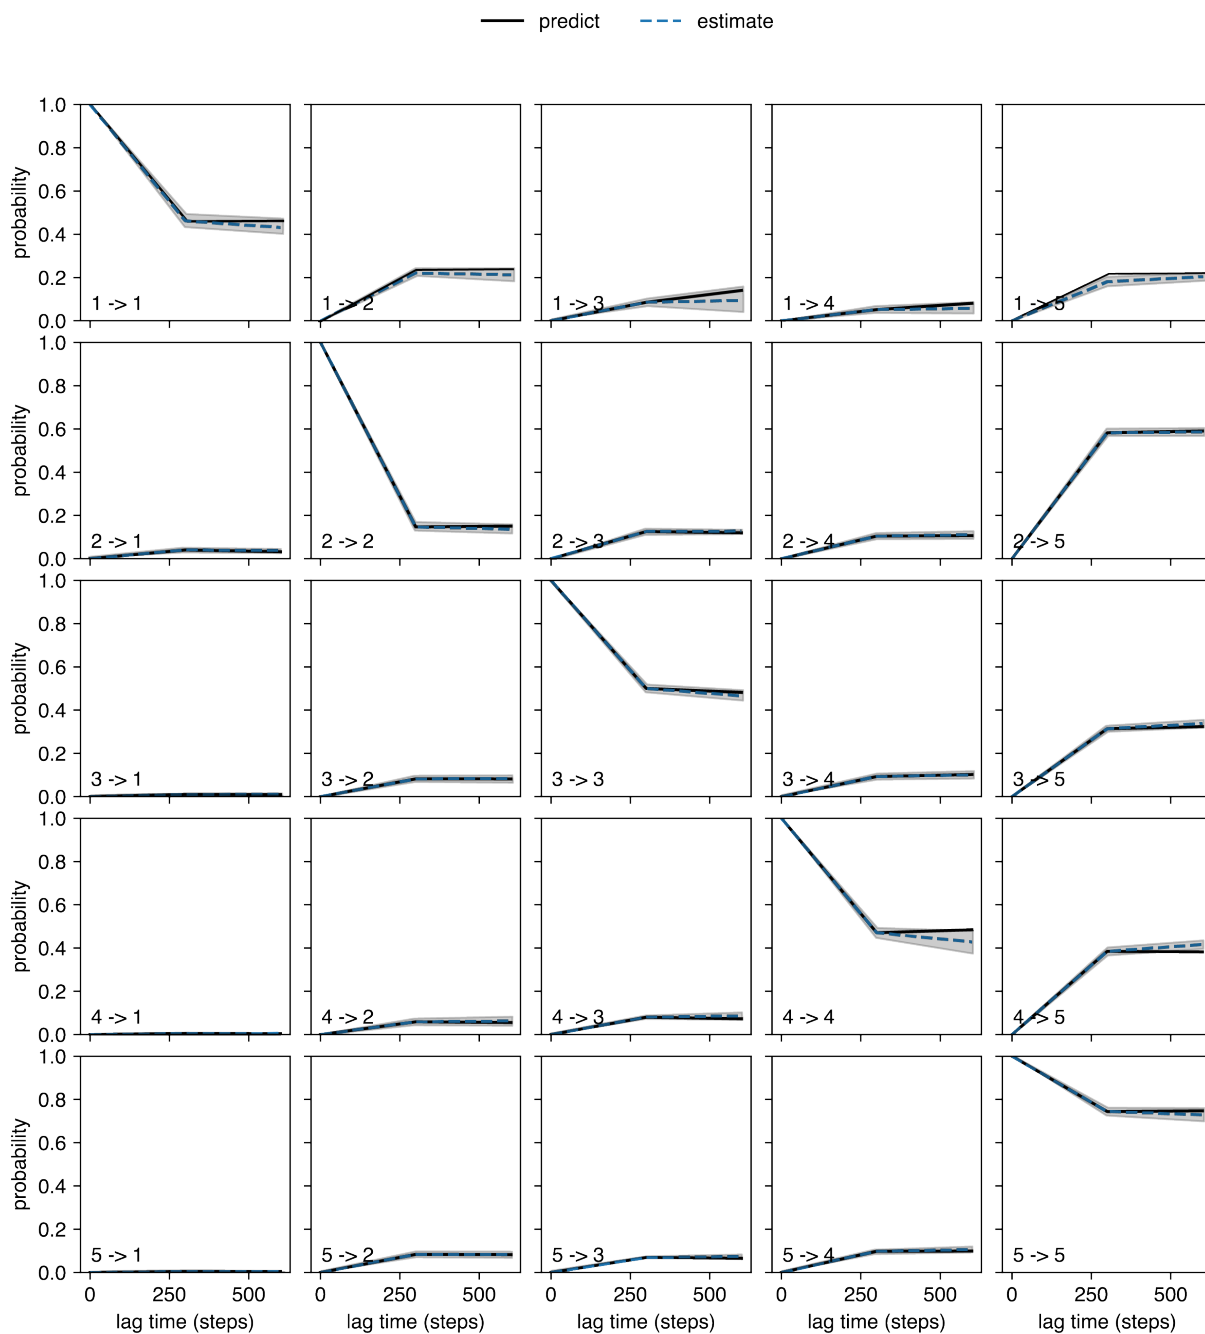

Figure S6: MSM validation for SANT1-SMO. Chapman-Kolmogorov test performed for 5 macrostates for SANT1-SMO. Chapman-Kolmogorov test was implemented using the pyEMMA package.(1)

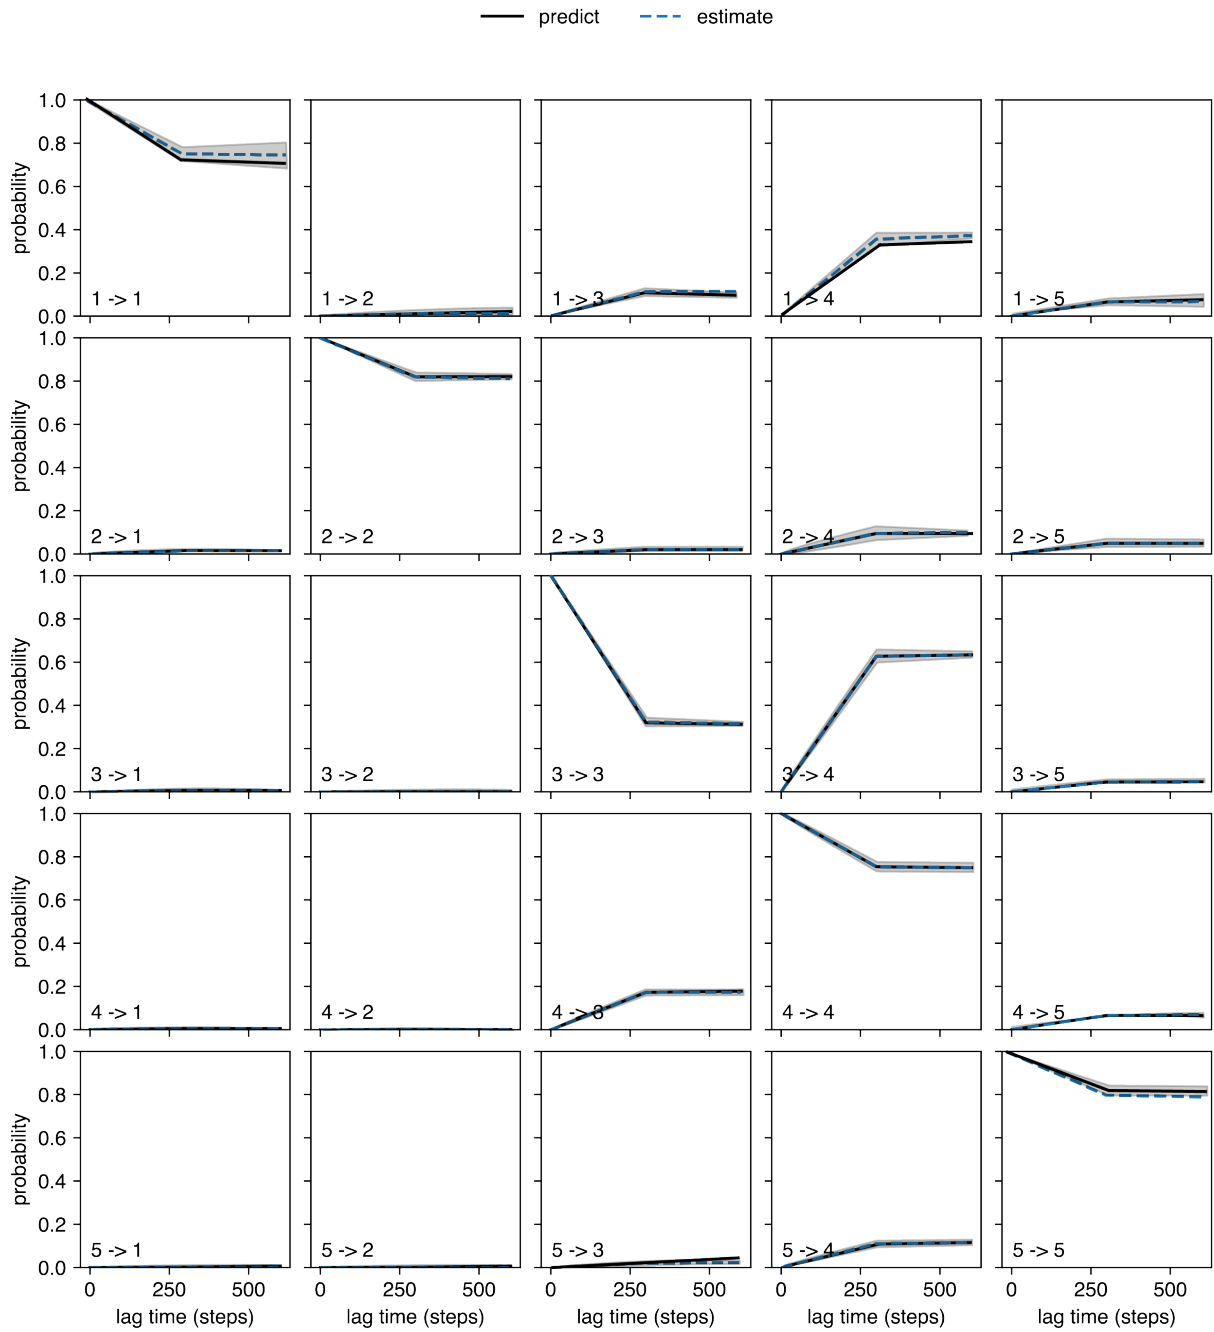

Figure S7: MSM validation for SAG-SMO. Chapman-Kolmogorov test performed for 5 macrostates for SAG-SMO. Chapman-Kolmogorov test was implemented using the pyEMMA package.(1)

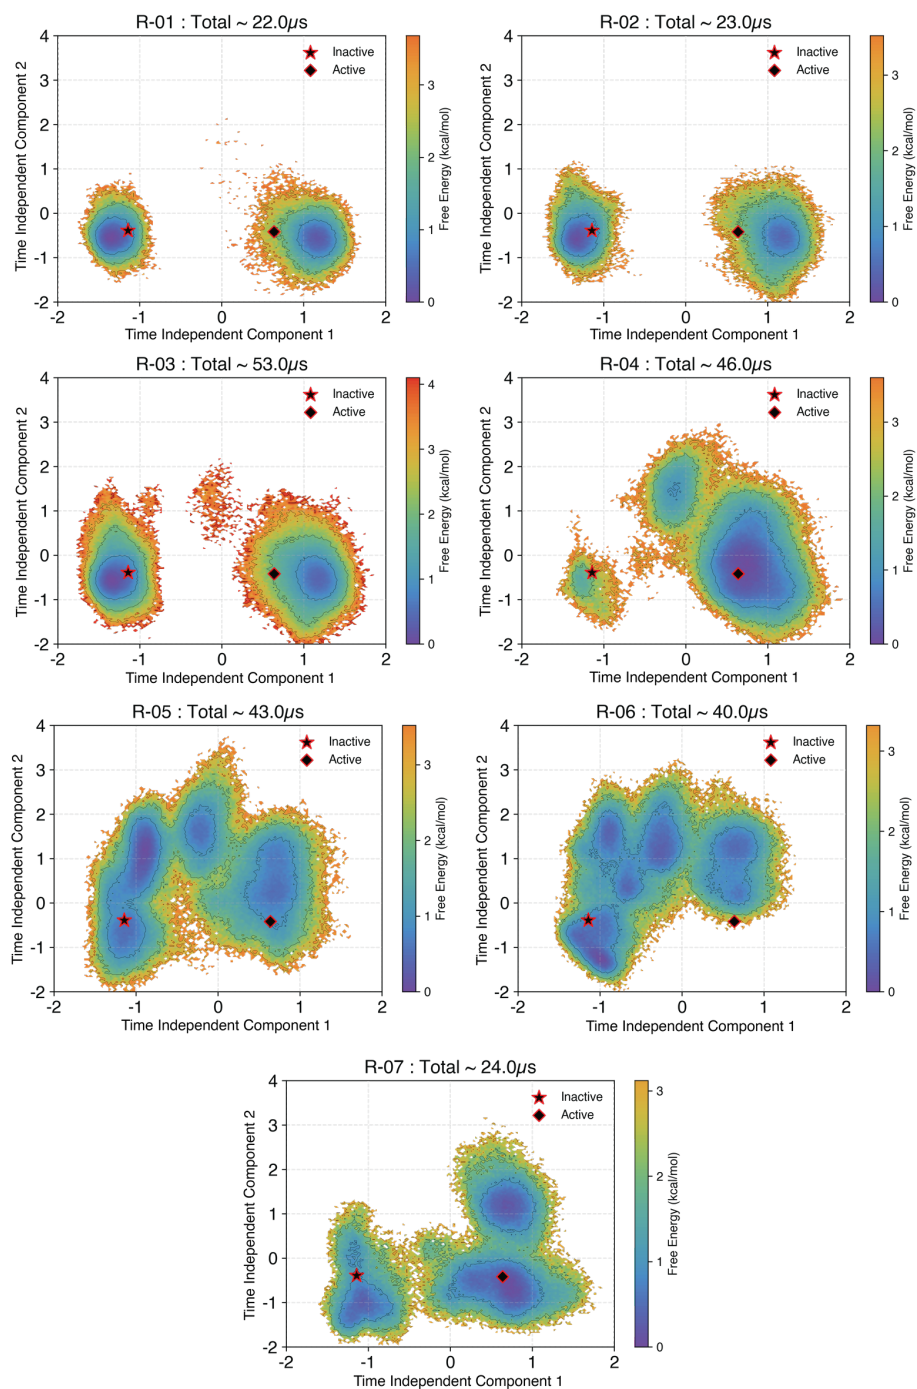

Figure S8: Roundwise data collection for adaptive sampling in Apo-SMO. The 2 startpoints and amount of data collected in that round are mentioned on each plot. A total of 7 rounds of sampling was performed.

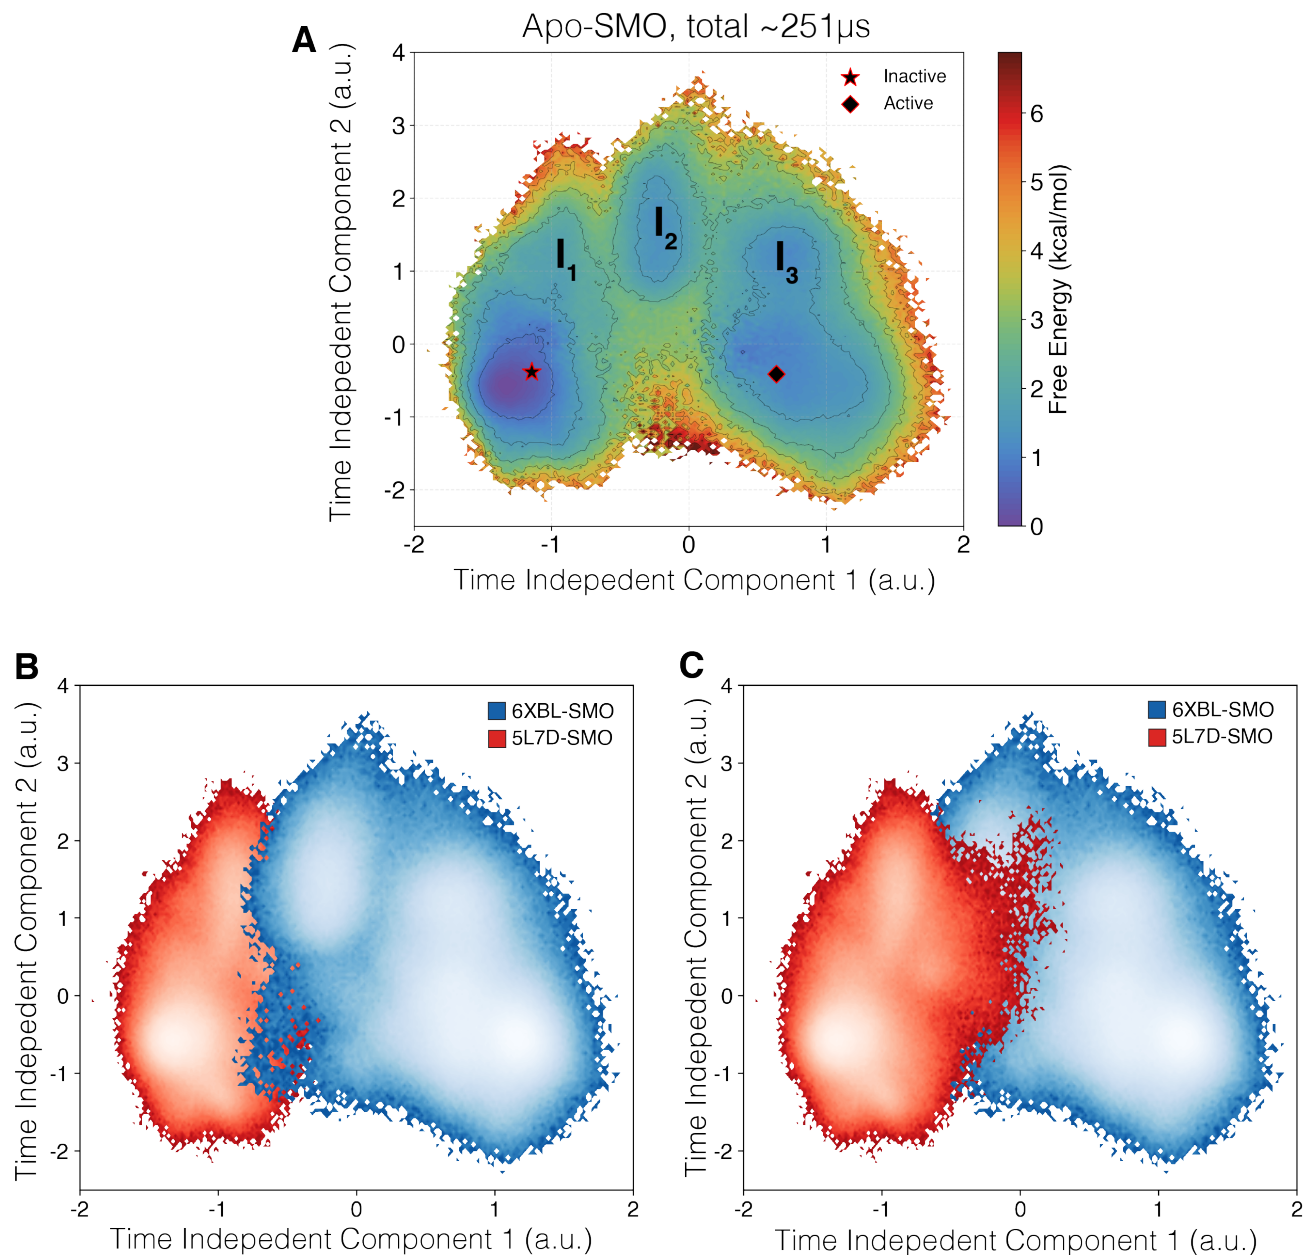

Figure S9: Apo-SMO tICA plots outlining the slowest processes. (A) Projection of MSM weighted simulation data for Apo-SMO on the tICA space, using the 2 slowest components. The inactive and active starting points are marked. The inactive and active starting points show a free energy difference of  $\sim 1 \text{ kcal.mol}^{-1}$ . Intermediate states  $I_1$ ,  $I_2$  and  $I_3$  are as marked. The intermediate states  $I_{1-3}$  were defined based on metastable basins and free energy barriers associated with transitioning from an inactive to an active state. A cutoff of  $1.8 \text{ kcal/mol}$  was used to separate one basin from another. (B,C) Projection of the data for each starting point shown separately on the tICA landscape. The two islands show overlap, indicating transitions that span the slowest component. Red denotes the data collected from the inactive starting structure, while Blue denotes the data collected from the active starting structure.

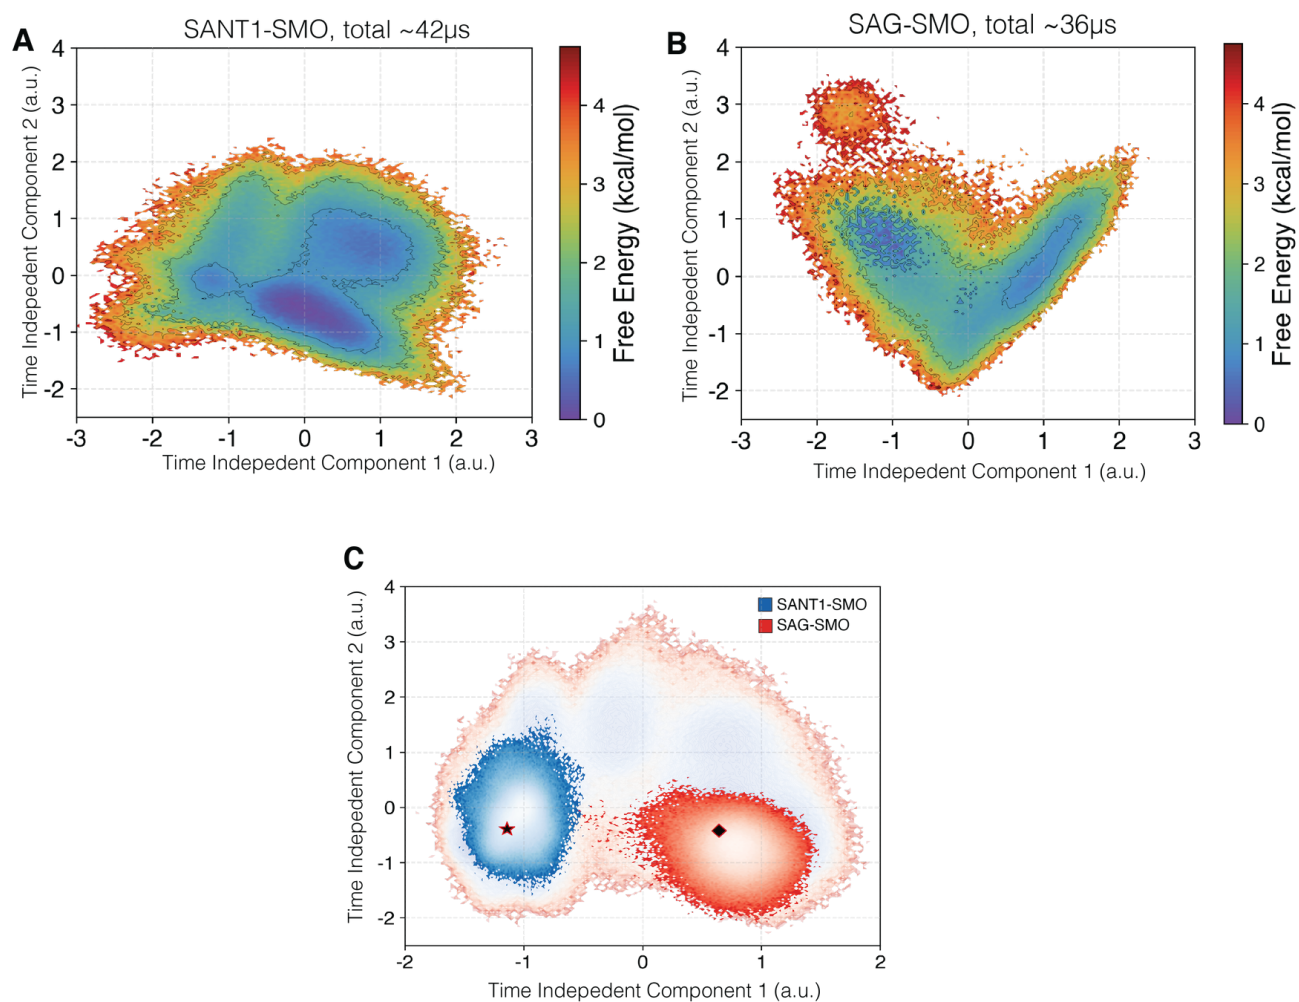

Figure S10: Projection of MSM weighted simulation data for (A) SANT1-SMO and (B) SAG-SMO on the tICA space, using the 2 slowest components. (C) The same data as (A) and (B), when projected on the tICA space defined by Apo-SMO. The inactive and active structures are marked as star and diamond, respectively.

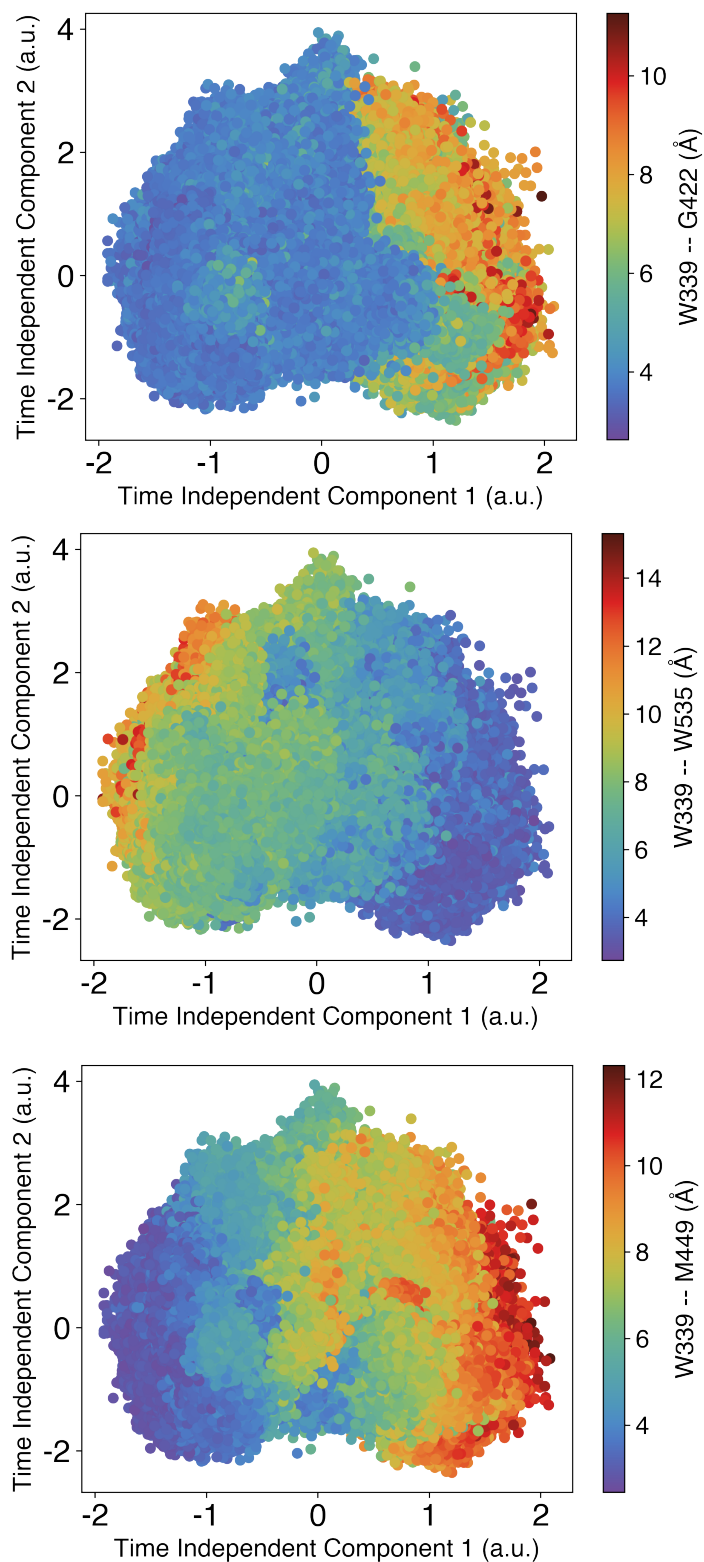

Figure S11: tICA Scatterplots show residue-correlated movements with activation on tICA space. Scatterplots showing the correlation of the intracellular residue distances W339-G422 (TM3-TM5), W339-W535 (Ionic Lock) and W339-M449 (TM3 - TM6), projected on the tICA landscape. tIC1 corresponds to SMO activation, hence these distances are integral to SMO activation.

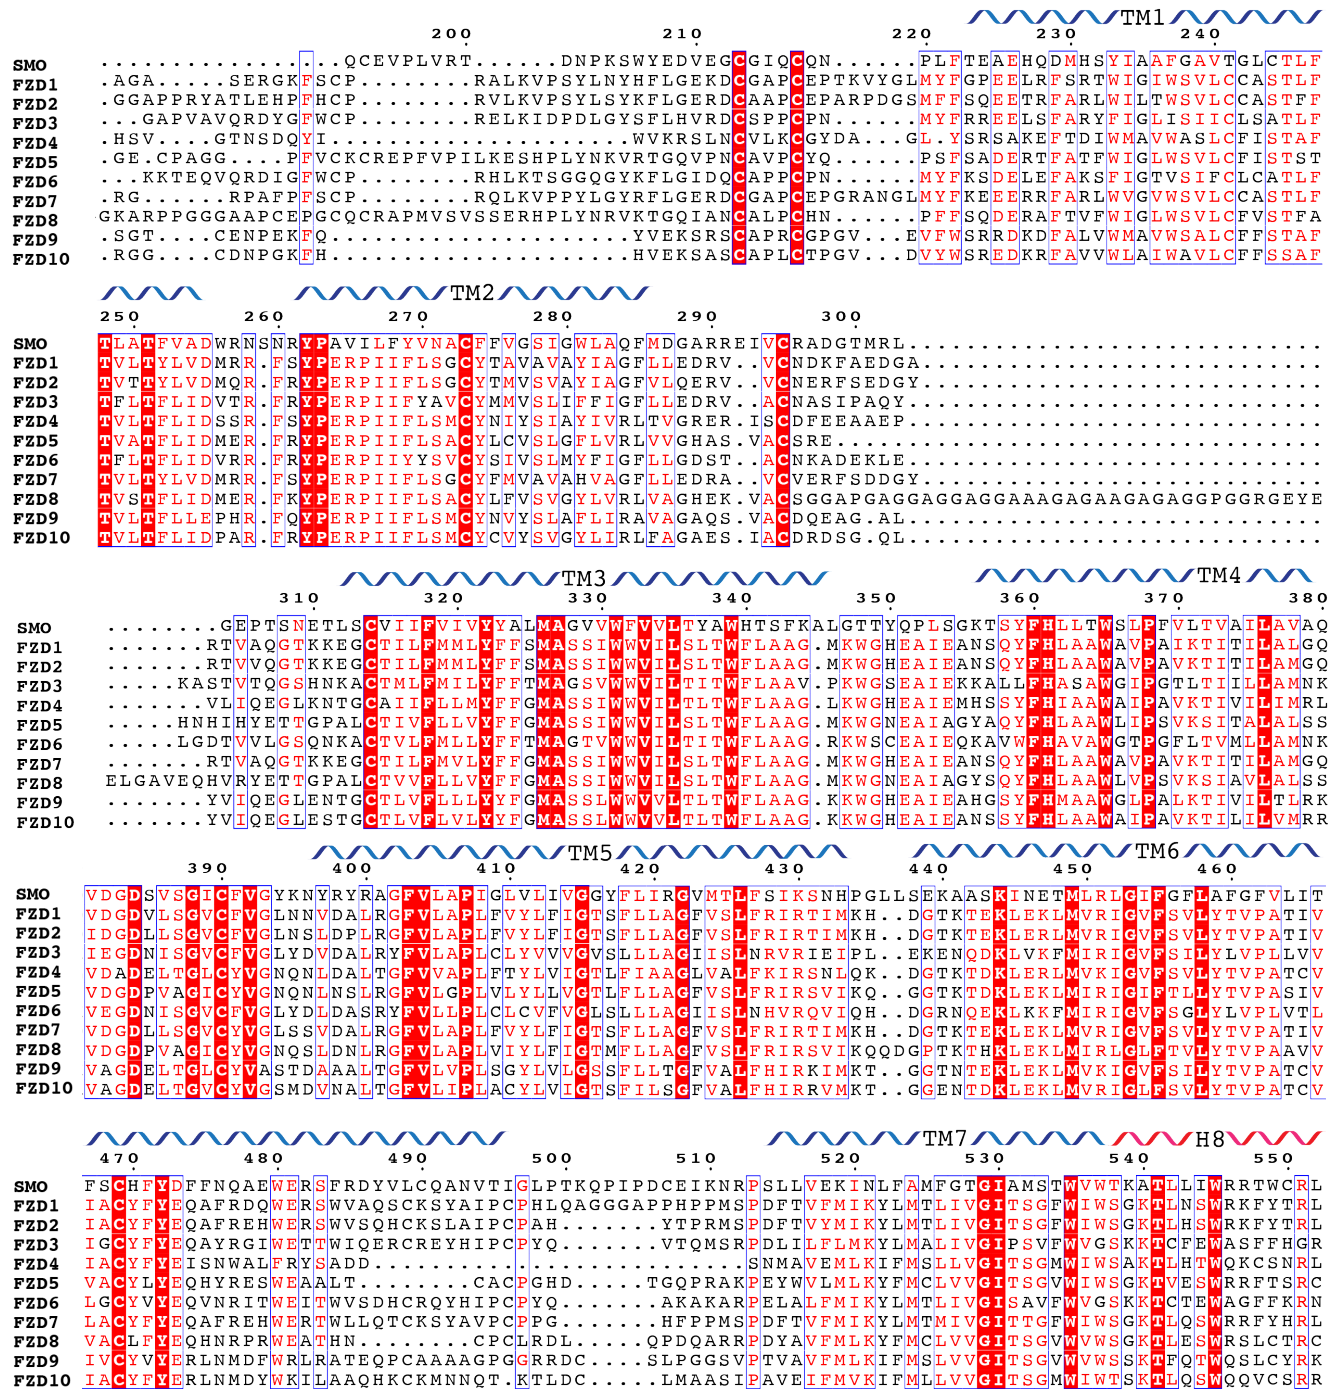

Figure S12: Multiple Sequence Alignment of Class F receptor Transmembrane Domains. Residues highlighted in red are conserved across the entire family.

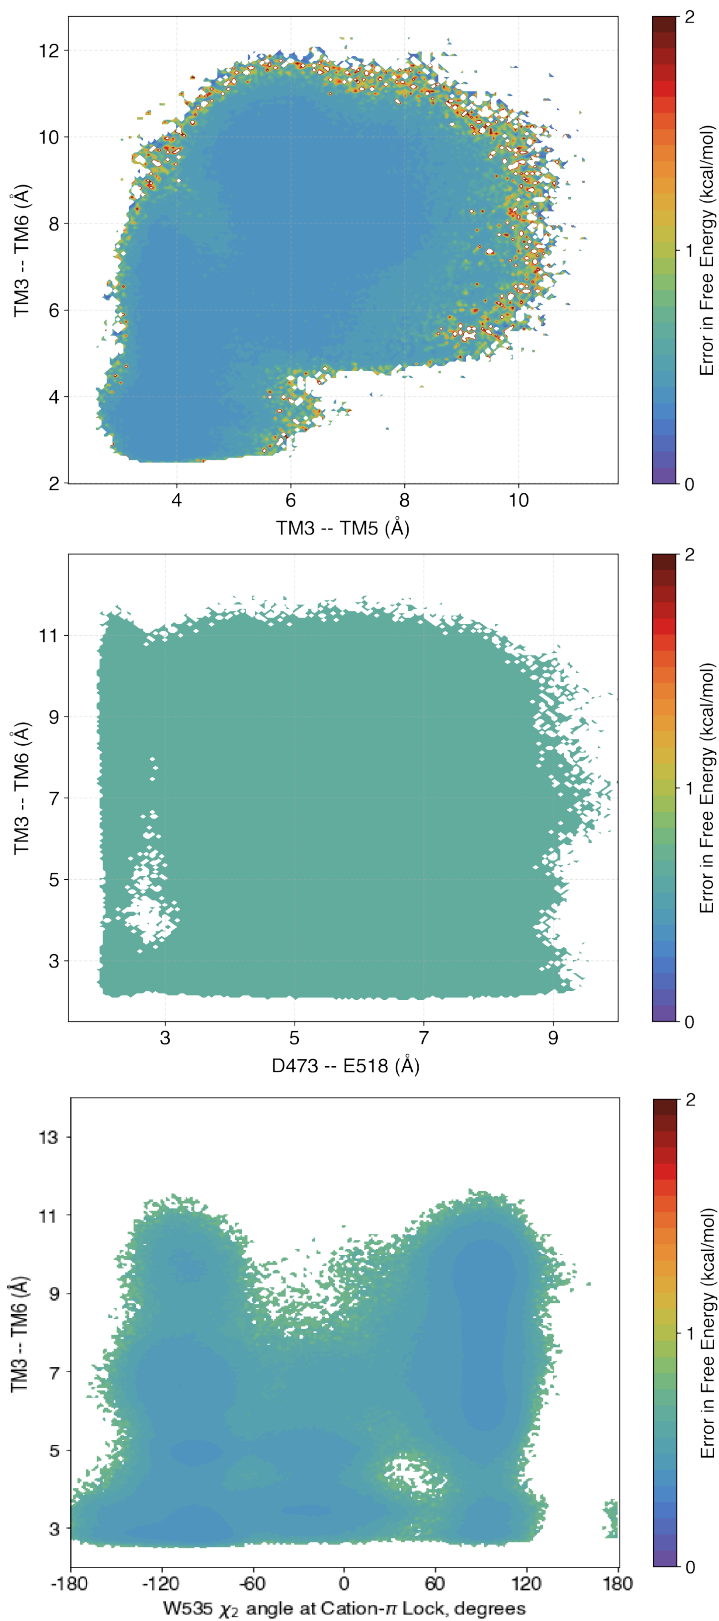

Figure S13: Error in the free-energy plots discussed in Fig 2 of the main text. Errors calculated using bootstrapping - 80% of the data was used in 200 iterations to produce the error.



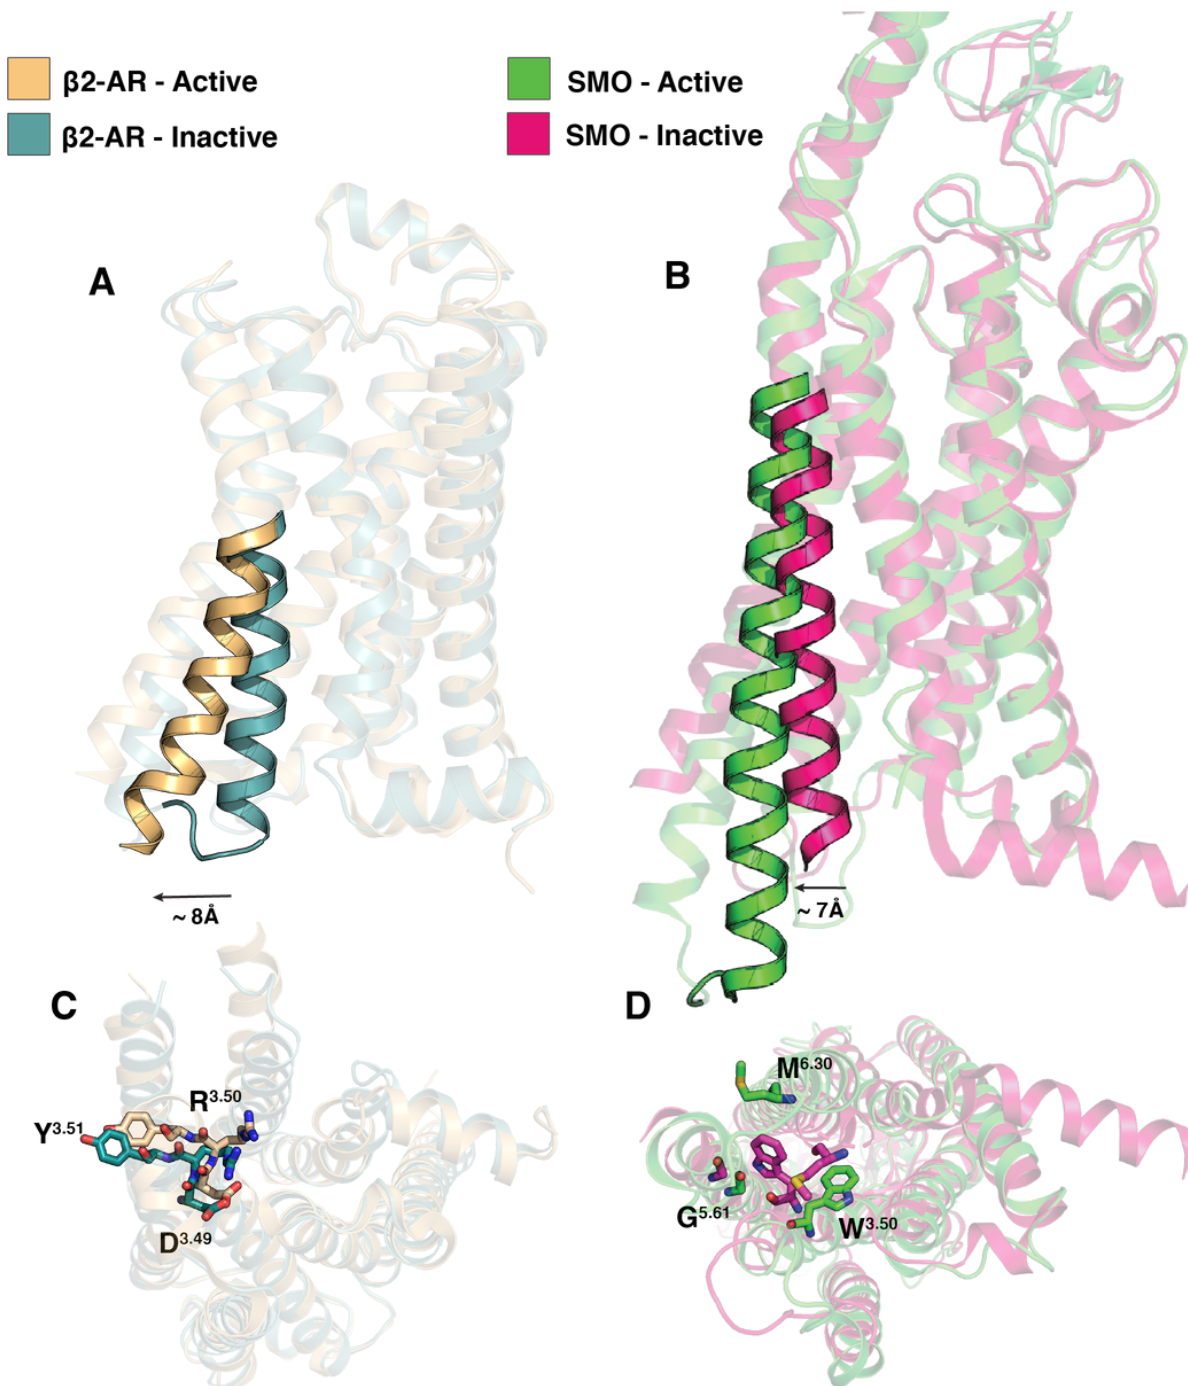

Figure S14: Qualitative comparison in the structural commonalities between Class A and Class F GPCRs.  $\beta$ <sub>2</sub>-AR (A), a class A GPCR, shows the canonical outward movement of TM6 corresponding to receptor activation (2, 3). SMO (B) also shows the corresponding outward movement. (C,D) Intracellular view of the D-R-Y (C) and W-G-M (D) motifs.

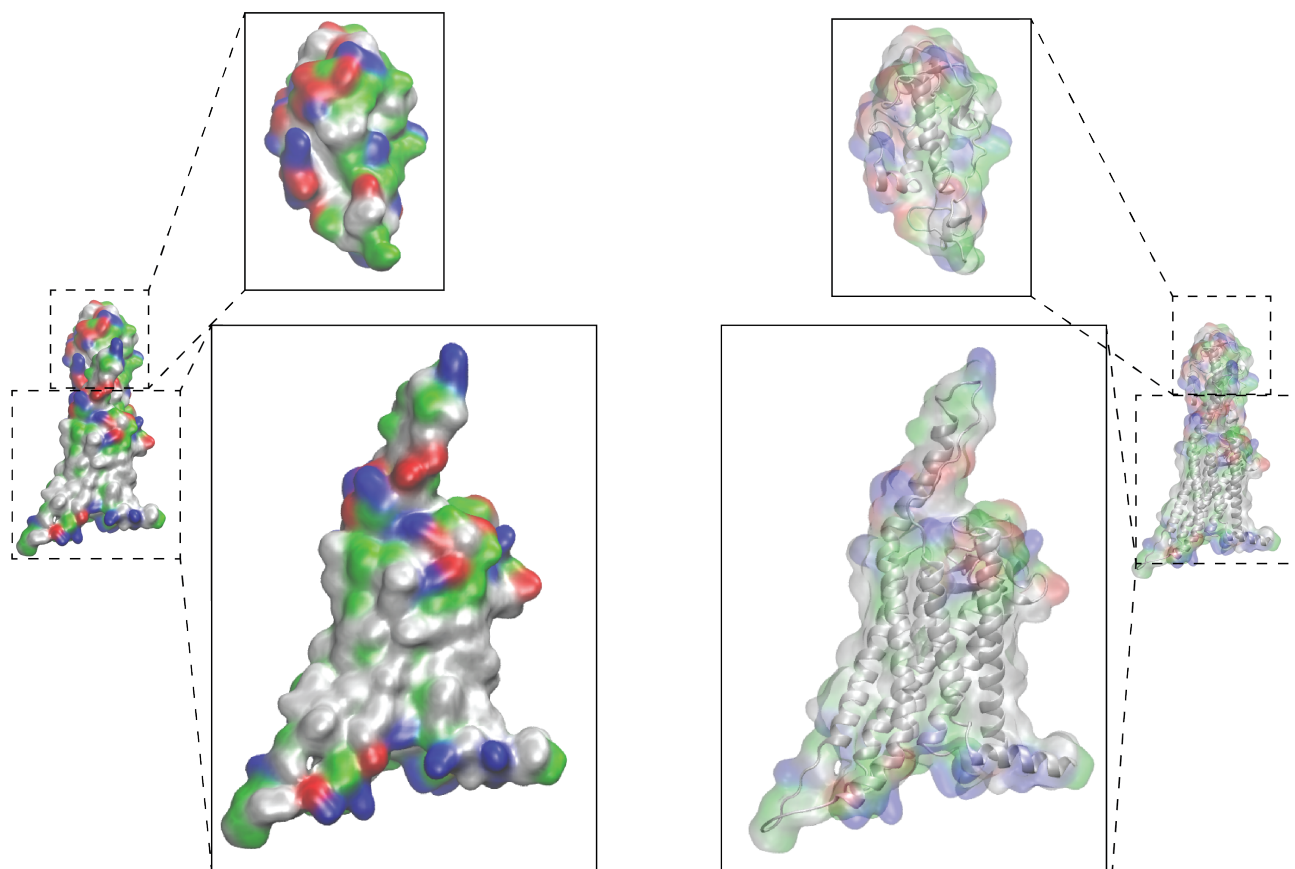

Figure S15: Difference in the polarity of residues between the CRD (top) vs TMD (bottom). Residues colored in red-blue are polar, while green-white residues show the hydrophobic residues.

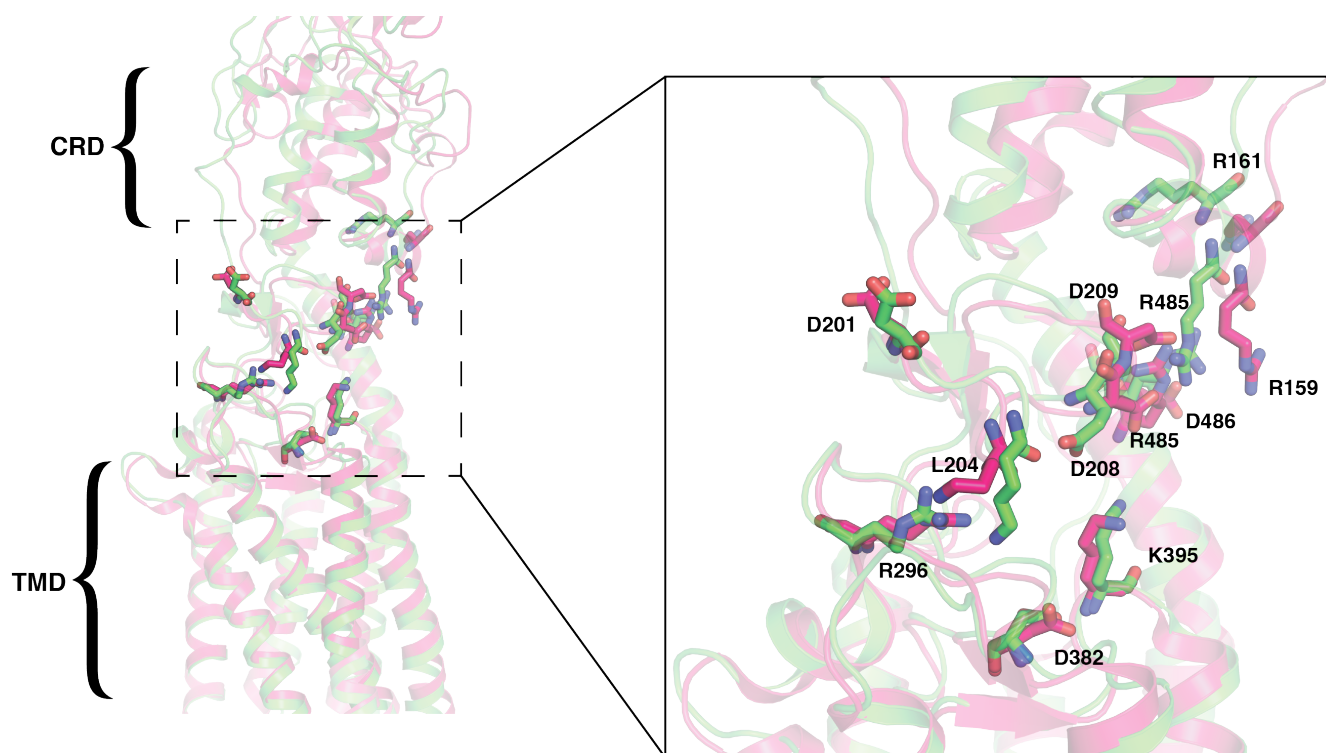

Figure S16: Rearrangement of the salt-bridges on the CRD-TMD interface. Inset shows the particular salt bridges involved in SMO activation.

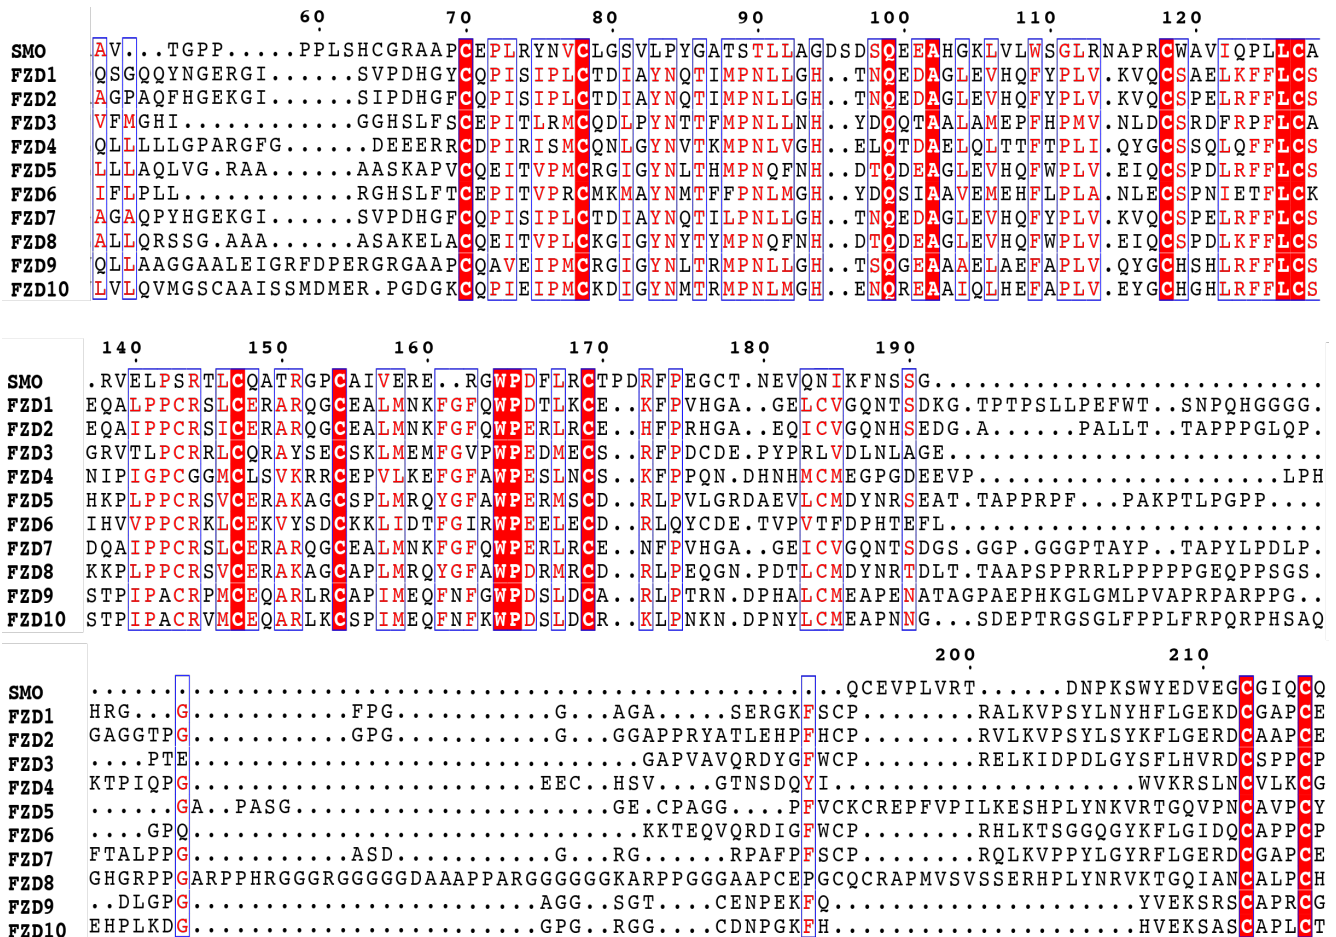

Figure S17: Multiple Sequence Alignment for the CRD of Class F receptors. The alignment was performed using ESPrnt3 web server(4, 5)

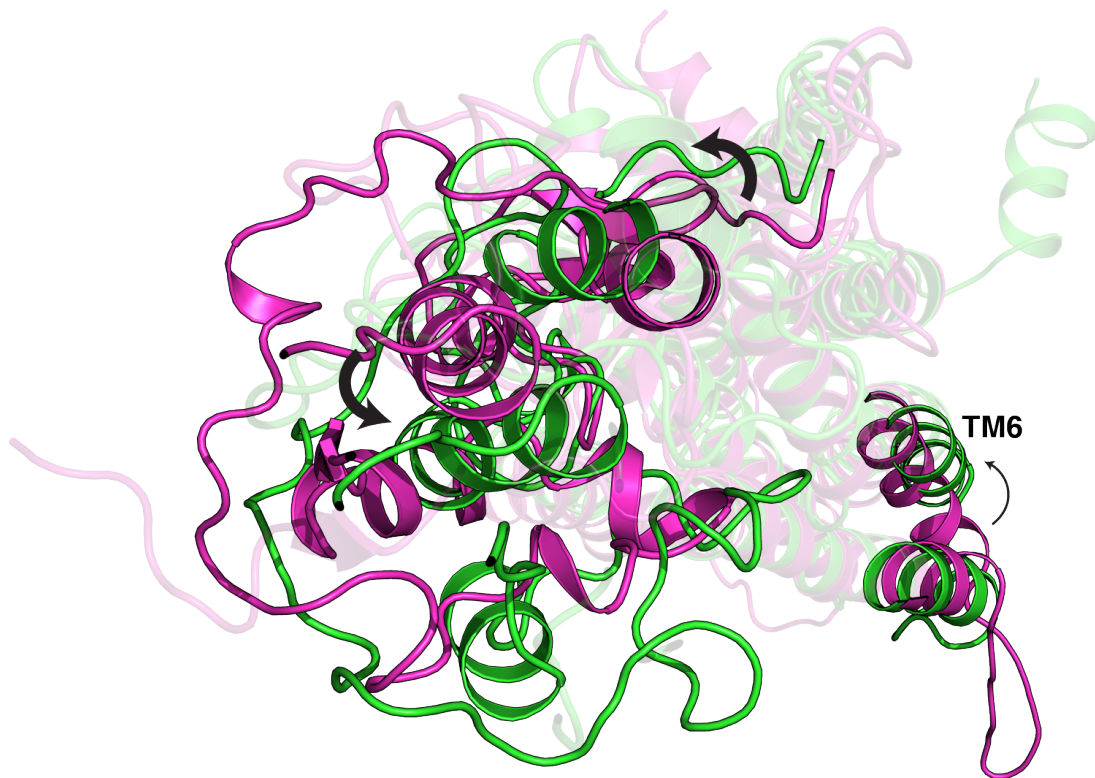

Figure S18: Rotation of CRD on activation. (Pink-Inactive SMO; Green-Active SMO) CRD undergoes a reorientation during SMO activation, which is characterized by the outward movement of TM6.

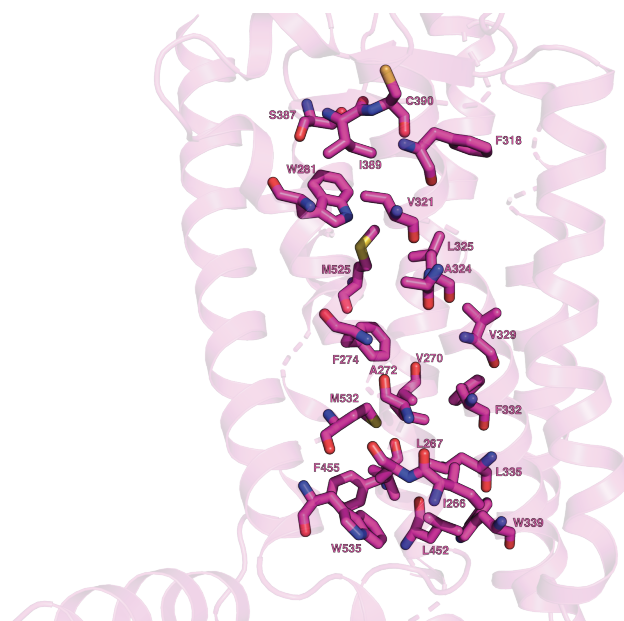

Figure S19: Hydrophobic tunnel inside SMO. The tunnel inside SMO consists of primarily hydrophobic residues, lining the tunnel from the extracellular end (top) to the intracellular end (bottom)

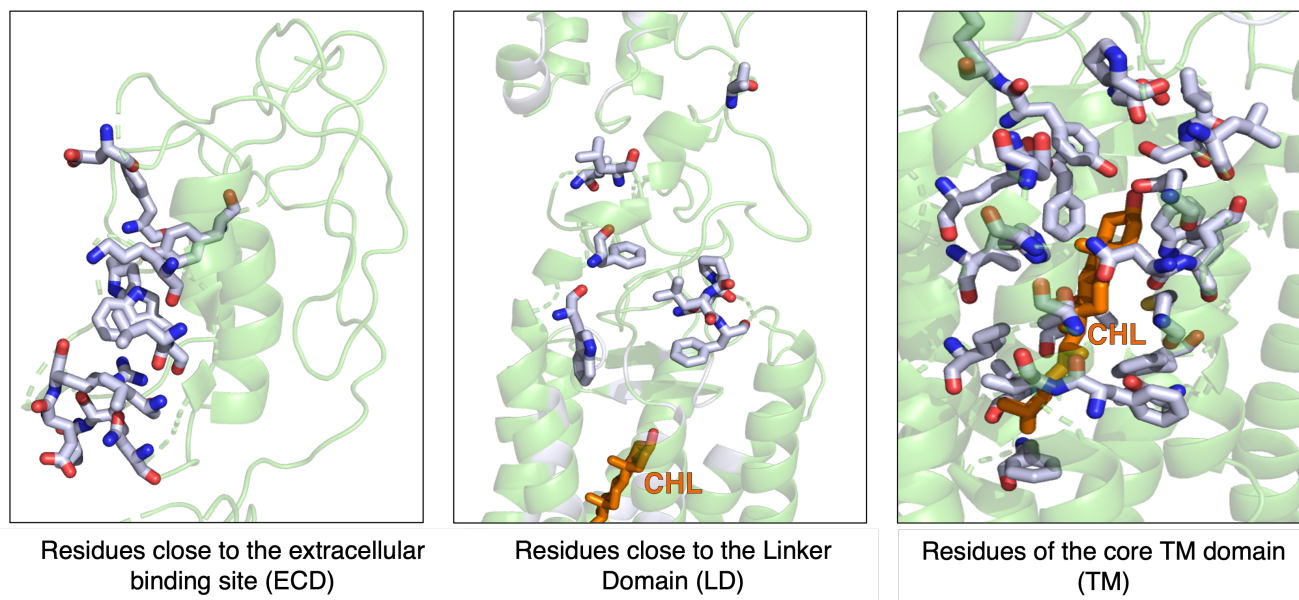

Figure S20: Pathway to the CRD for proposed cholesterol transport. Various residues line the pathway between the entry-point of cholesterol from the membrane to the binding site, in the CRD. These consist of residues close to the extracellular binding site in the ECD, in the linker domain (LD) which connects the CRD to the TMD, and in the core TM domain. The residues were determined based on the proximity of the sterol in multiple sterol-bound resolved structures of SMO (PDB ID 6XBL, 6XBM(6) and 5L7D(7)).

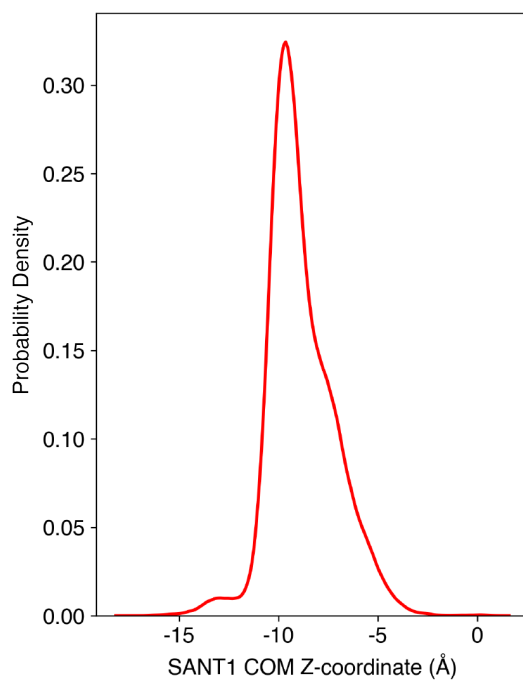

Figure S21: Lateral movement of SANT1 center of mass. Simulations show a minimal lateral movement of SANT1 across the hydrophobic tunnel, suggesting that SANT1 operates as an antagonist by sterically blocking the tunnel.

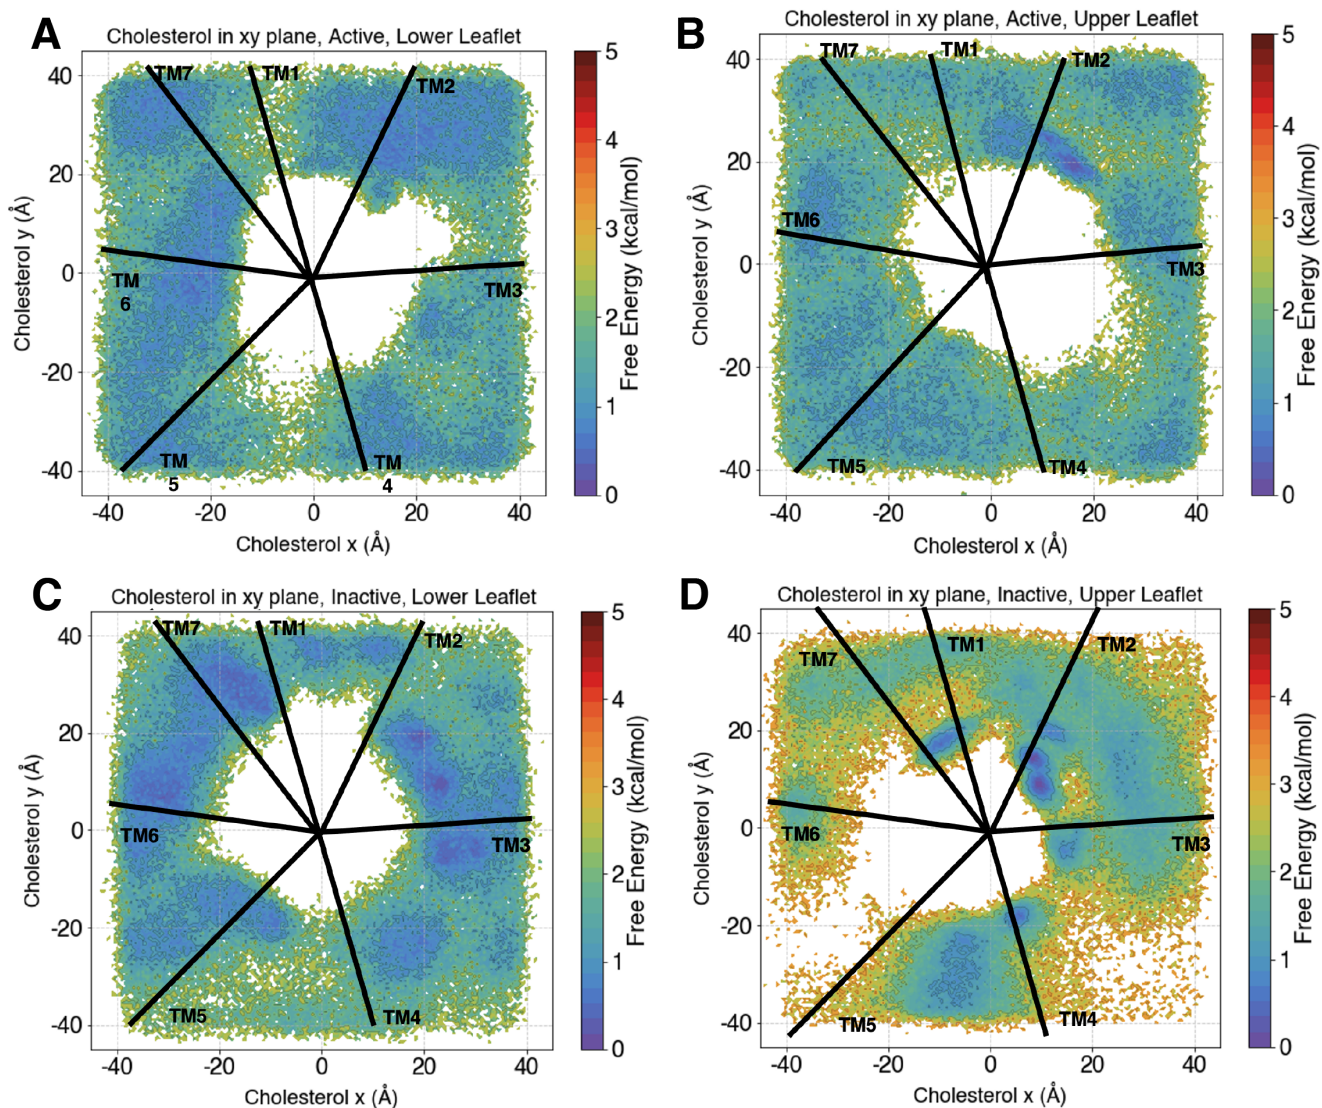

Figure S22: Observed cholesterol densities in the membrane during Apo-SMO simulations. The plots show the distribution of the cholesterol in the membrane, with the white space in the middle occupied by SMO. (A-C) Cholesterol shows a uniform distribution in the Lower leaflet regardless of the conformation, as well as the upper leaflet in the active state. (D) Cholesterol, however, does show a propensity to cluster outside the area between TM2 and TM3 in the upper leaflet, showing a conformational dependence on the cholesterol distribution. The black lines show the average position of the helix in the membrane as seen from above, looking directly into the core of the protein.



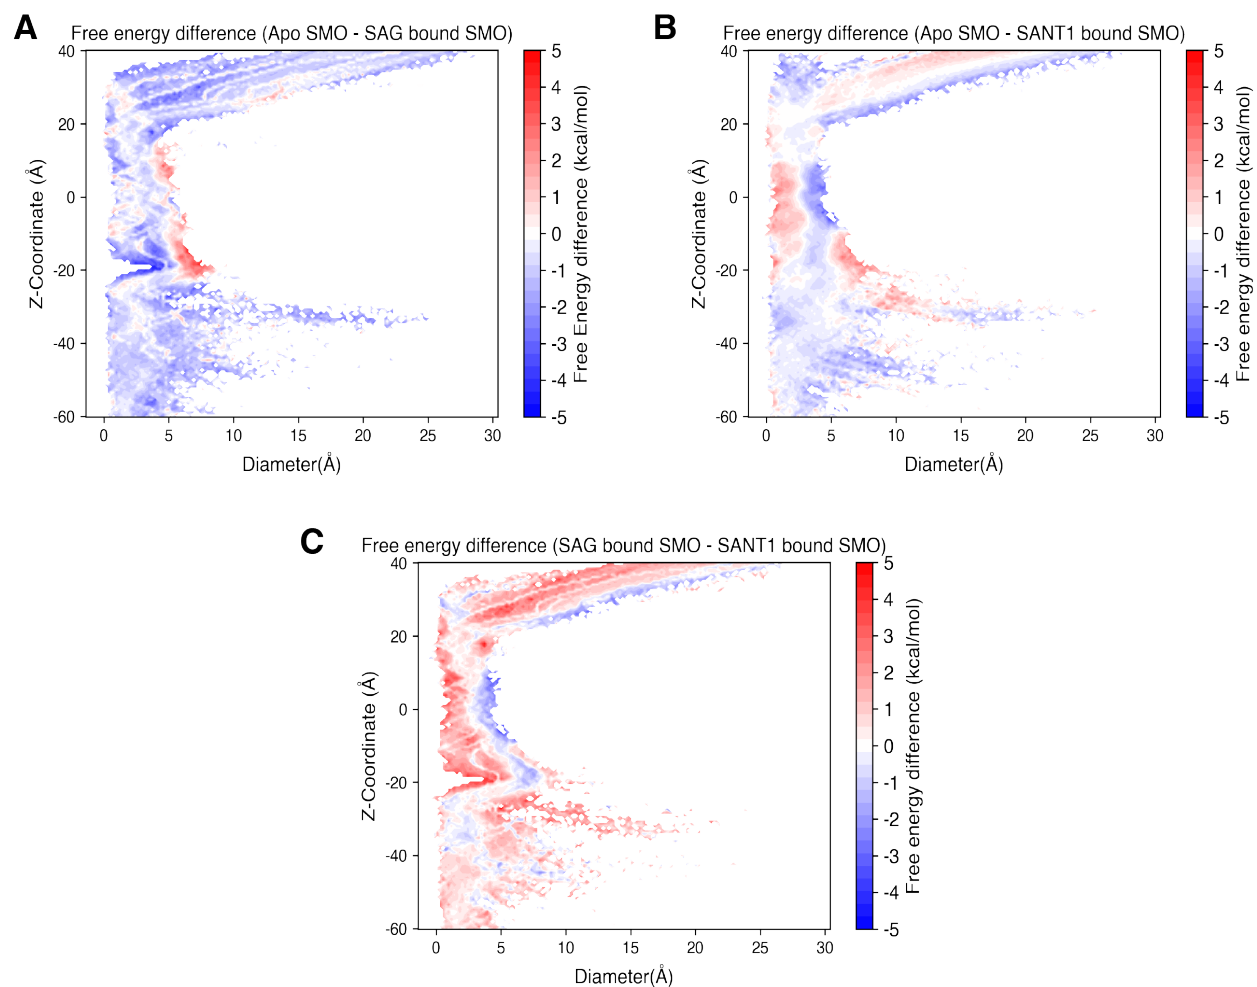

Figure S23: Free energy difference between the various plots shown in Fig 5. Z-coordinate vs tunnel diameter free energy differences were plotted between (A) - Apo-SMO and SAG bound SMO, (B) Apo-SMO and SANT1 bound SMO, and (C) SAG-bound SMO and SANT1-bound SMO.

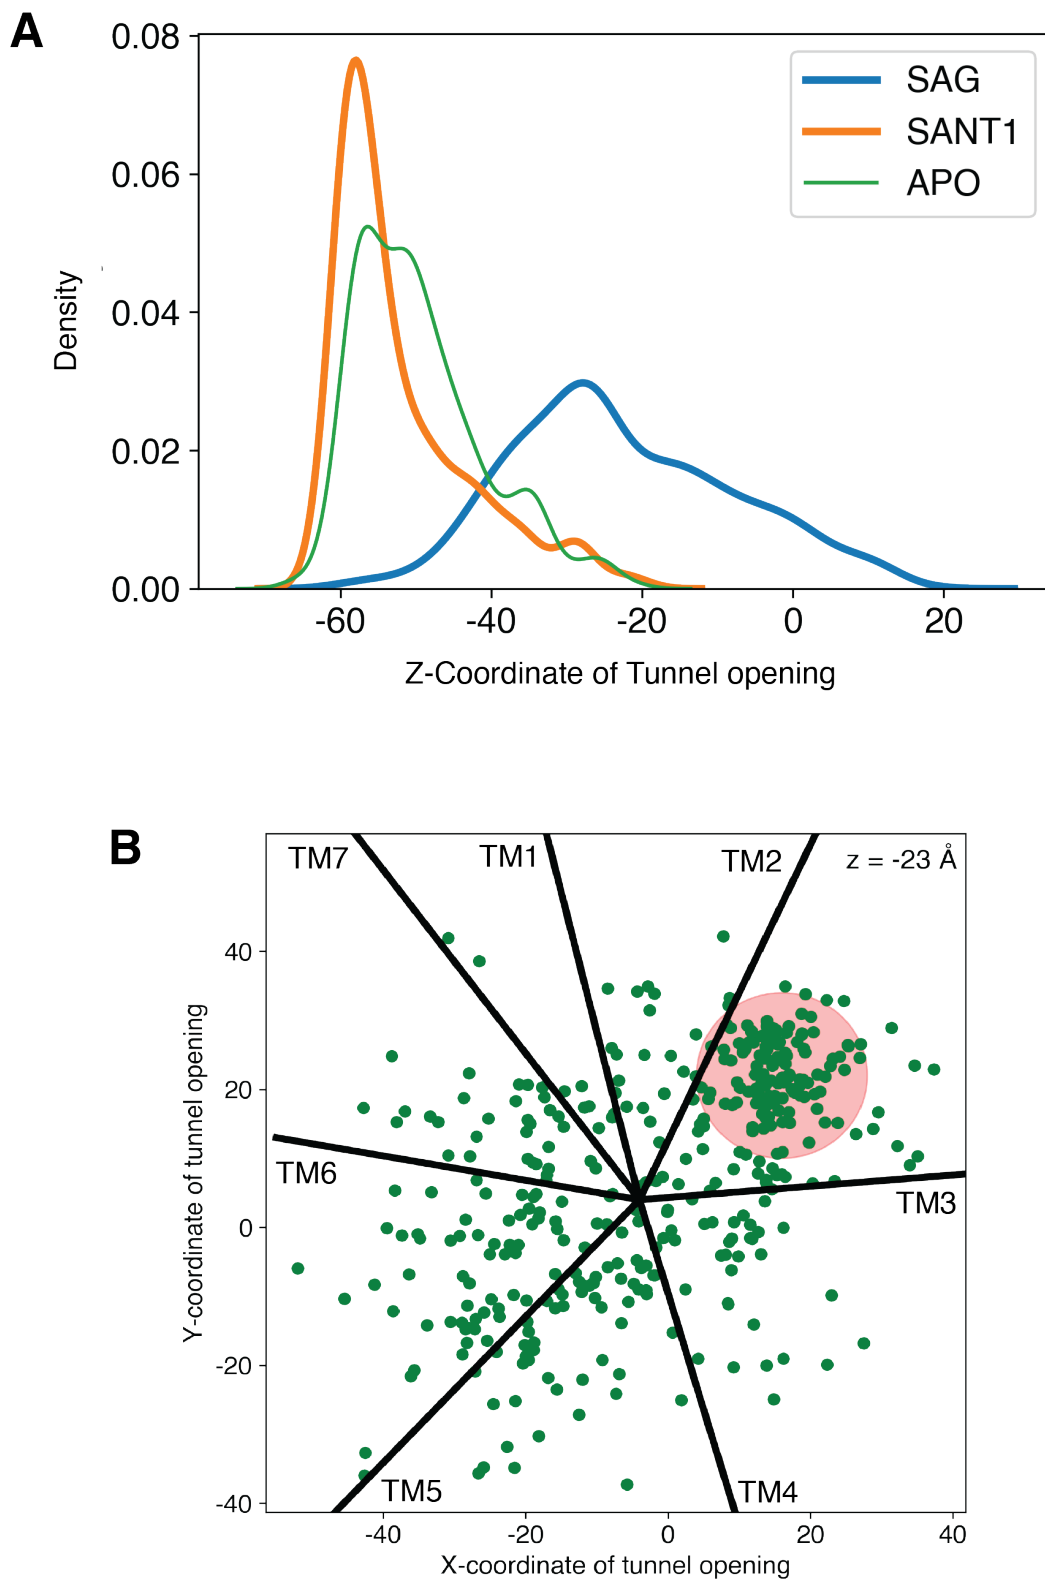

Figure S24: (A) Probability density of Z-coordinate of tunnel opening. Simulations show that the tunnel opens in the upper leaflet of the membrane,  $z \sim -22$ . (B) The Y v/s X coordinate ( $Z = -23$ ) of tunnel opening in SAG-SMO. A cluster is centered around the interface of TM2 and TM3, circled in red. The various helical boundaries are shown using black lines.

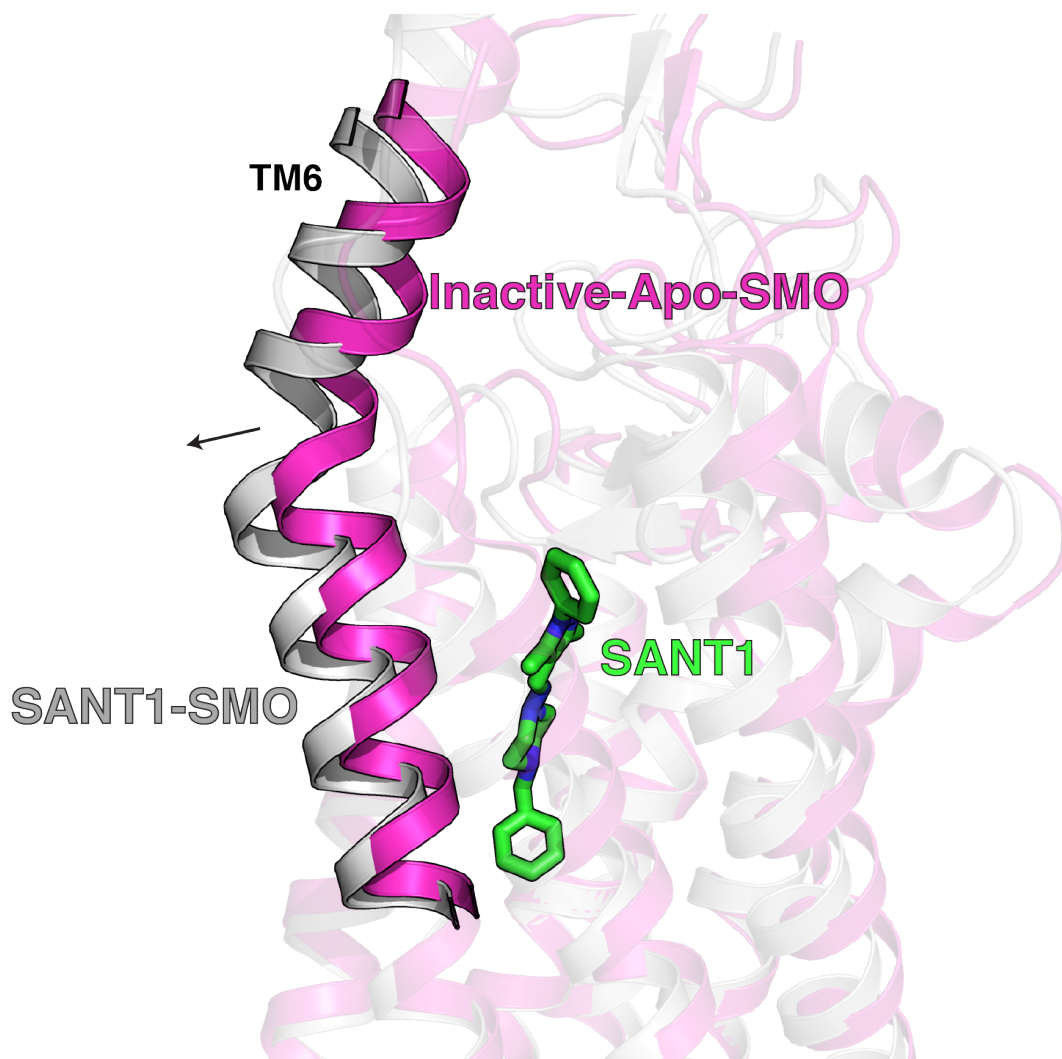

Figure S25: Helical displacement of TM6 by SANTI1. This helical displacement causes the shift in the allosteric network of SMO, precluding the transition to active state.

| Simulation Round | Amount of Apo-SMO-Data |
|------------------|------------------------|
| Round 1          | 22 $\mu$ s             |
| Round 2          | 23 $\mu$ s             |
| Round 3          | 53 $\mu$ s             |
| Round 4          | 46 $\mu$ s             |
| Round 5          | 43 $\mu$ s             |
| Round 6          | 40 $\mu$ s             |
| Round 7          | 24 $\mu$ s             |
| Total            | 251 $\mu$ s            |

Table S1: Round wise data collection for Apo-SMO.

| Simulation Round | Amount of SAG-SMO-Data | Amount of SANTI1-SMO-Data |
|------------------|------------------------|---------------------------|
| Round 1          | 10 $\mu$ s             | 10 $\mu$ s                |
| Round 2          | 12 $\mu$ s             | 14 $\mu$ s                |
| Round 3          | 14 $\mu$ s             | 18 $\mu$ s                |
| Total            | 36 $\mu$ s             | 42 $\mu$ s                |

Table S2: Round wise data collection for SAG-SMO and SANTI1-SMO

| Modelled Residues in 5L7D-inac-Apo-SMO | Constraints       | Location |
|----------------------------------------|-------------------|----------|
| I429                                   | None              | ICL3     |
| K430                                   | None              | ICL3     |
| S431                                   | None              | ICL3     |
| N432                                   | None              | ICL3     |
| H433                                   | None              | ICL3     |
| P434                                   | None              | ICL3     |
| G435                                   | None              | ICL3     |
| L436                                   | None              | ICL3     |
| L437                                   | None              | ICL3     |
| S438                                   | None              | ICL3     |
| E439                                   | None              | ICL3     |
| K440                                   | $\alpha$ -helical | TM6      |
| A441                                   | $\alpha$ -helical | TM6      |
| A442                                   | $\alpha$ -helical | TM6      |
| S443                                   | $\alpha$ -helical | TM6      |
| K444                                   | $\alpha$ -helical | TM6      |
| I445                                   | $\alpha$ -helical | TM6      |

Table S3: Modelled residues in 5L7D-inactive-Apo-SMO starting structure. The helical content of K440-I445 was modelled based on the structure of SANTI1-bound SMO (PDB: 4N4W) (8)

| Lipid         | Upper Leaflet | Lower Leaflet |
|---------------|---------------|---------------|
| Cholesterol   | 21            | 21            |
| POPC          | 76            | 76            |
| Sphingomyelin | 4             | 4             |
| Total         | 101           | 101           |

Table S4: Membrane composition used for simulations.

|      |      |      |      |      |      |
|------|------|------|------|------|------|
| P58  | P59  | R66  | R173 | Y85  | K133 |
| L106 | Y130 | L108 | W109 | W109 | L126 |
| R113 | W119 | A115 | E211 | R117 | W206 |
| R117 | G212 | W119 | Q123 | Q123 | F187 |
| R151 | W163 | W163 | R168 | C169 | F174 |
| N202 | W206 | W206 | E211 | W206 | G212 |
| Y207 | E208 | Y207 | D209 | F222 | L515 |
| H231 | F285 | H231 | R290 | L246 | F275 |
| F252 | S259 | F252 | F268 | W256 | F268 |
| Y262 | L353 | Q284 | R290 | G288 | E292 |
| R290 | R291 | F332 | A459 | L335 | W339 |
| W339 | G422 | W339 | M449 | W339 | G453 |
| W339 | W535 | F343 | M449 | L346 | I445 |
| L353 | F360 | K356 | F360 | Q380 | Y399 |
| V381 | V392 | Y397 | F474 | Y397 | Q477 |
| L419 | F457 | H433 | P434 | H433 | G435 |
| G435 | L436 | S443 | N446 | H470 | F474 |
| W480 | P513 | Y487 | Q491 | Y487 | I509 |
| Q502 | I504 | L516 | K519 | T534 | W537 |

Table S5: Adaptive Sampling metrics used for clustering in Apo-SMO, SANT1-SMO and SAG-SMO. Double lines separate pairs of residues.

## REFERENCES

1. Scherer, M. K., B. Trendelkamp-Schroer, F. Paul, G. Pérez-Hernández, M. Hoffmann, N. Plattner, C. Wehmeyer, J.-H. Prinz, and F. Noé, 2015. PyEMMA 2: A Software Package for Estimation, Validation, and Analysis of Markov Models. *J. Chem. Theory Comput.* 11:5525–5542. doi:10.1021/acs.jctc.5b00743.
2. Cherezov, V., D. M. Rosenbaum, M. A. Hanson, S. G. F. Rasmussen, F. S. Thian, T. S. Kobilka, H.-J. Choi, P. Kuhn, W. I. Weis, B. K. Kobilka, and R. C. Stevens, 2007. High-Resolution Crystal Structure of an Engineered Human  $\beta$ 2-Adrenergic G Protein-Coupled Receptor. *Science* 318:1258–1265. doi:10.1126/science.1150577.
3. Rasmussen, S. G. F., H.-J. Choi, J. J. Fung, E. Pardon, P. Casarosa, P. S. Chae, B. T. DeVree, D. M. Rosenbaum, F. S. Thian, T. S. Kobilka, A. Schnapp, I. Konetzki, R. K. Sunahara, S. H. Gellman, A. Pautsch, J. Steyaert, W. I. Weis, and B. K. Kobilka, 2011. Structure of a nanobody-stabilized active state of the  $\beta$ 2 adrenoceptor. *Nature* 469:175–180. doi:10.1038/nature09648.
4. Robert, X., and P. Gouet, 2014. Deciphering key features in protein structures with the new ENDscript server. *Nucleic Acids Res.* 42:W320–W324. doi:10.1093/nar/gku316.
5. ESPript. 2022. January 15 2022. <https://espript.ibcp.fr/ESPript/ESPript/index.php>.
6. Qi, X., L. Friedberg, R. D. Bose-Boyd, T. Long, and X. Li, 2020. Sterols in an intramolecular channel of Smoothened mediate Hedgehog signaling. *Nat. Chem. Biol.* 16:1368–1375. doi:10.1038/s41589-020-0646-2.
7. Byrne, E. F. X., R. Sircar, P. S. Miller, G. Hedger, G. Luchetti, S. Nachtergaele, M. D. Tully, L. Mydock-McGrane, D. F. Covey, R. P. Rambo, M. S. P. Sansom, S. Newstead, R. Rohatgi, and C. Siebold, 2016. Structural basis of Smoothened regulation by its extracellular domains. *Nature* 535:517–522. doi:10.1038/nature18934.
8. Wang, C., H. Wu, T. Evron, E. Vardy, G. W. Han, X.-P. Huang, S. J. Hufeisen, T. J. Mangano, D. J. Urban, V. Katritch, V. Cherezov, M. G. Caron, B. L. Roth, and R. C. Stevens, 2014. Structural basis for Smoothened receptor modulation and chemoresistance to anticancer drugs. *Nat. Commun.* 5:4355. doi:10.1038/ncomms5355.
